# Supplementary material
Source: PubMed Central journal article supplement (PMC8753498)
Supplement: jama-e2123065-s003.pdf [file jama-e2123065-s003.pdf]

## Supplementary Online Content

Siddharthan T, Pollard SL, Quaderi SA, et al; GECostudy Investigators. Discriminative Accuracy of Chronic Obstructive Pulmonary Disease Screening Instruments in 3 Low- and Middle-Income Country Settings. *JAMA*. doi:10.1001/jama.2021.23065

eFigure 1. STARD Flow Diagram, Overall and for Nepal, Peru, and Uganda

eTables 1-12

eFigure 2. Performance of the 3 COPD Screening Tools at the 3 sites, Weighted to the Population Data

eTables 13-25

This supplementary material has been provided by the authors to give readers additional information about their work.

## SUPPLEMENTAL TABLES AND FIGURES FOR PRIMARY ANALYSIS

**Note:** Reference numbers in this section refer to the primary reference list.

### I. Standards for the Reporting of Diagnostic accuracy studies (STARD) flow diagrams

Below, we present STARD flow diagrams, overall (eFigure 1a) and for each site (eFigures 1b-d). Each of these figures has additional details on reasons for exclusion.

**FIGURE S1a:** STARD Flow Diagram, overall.

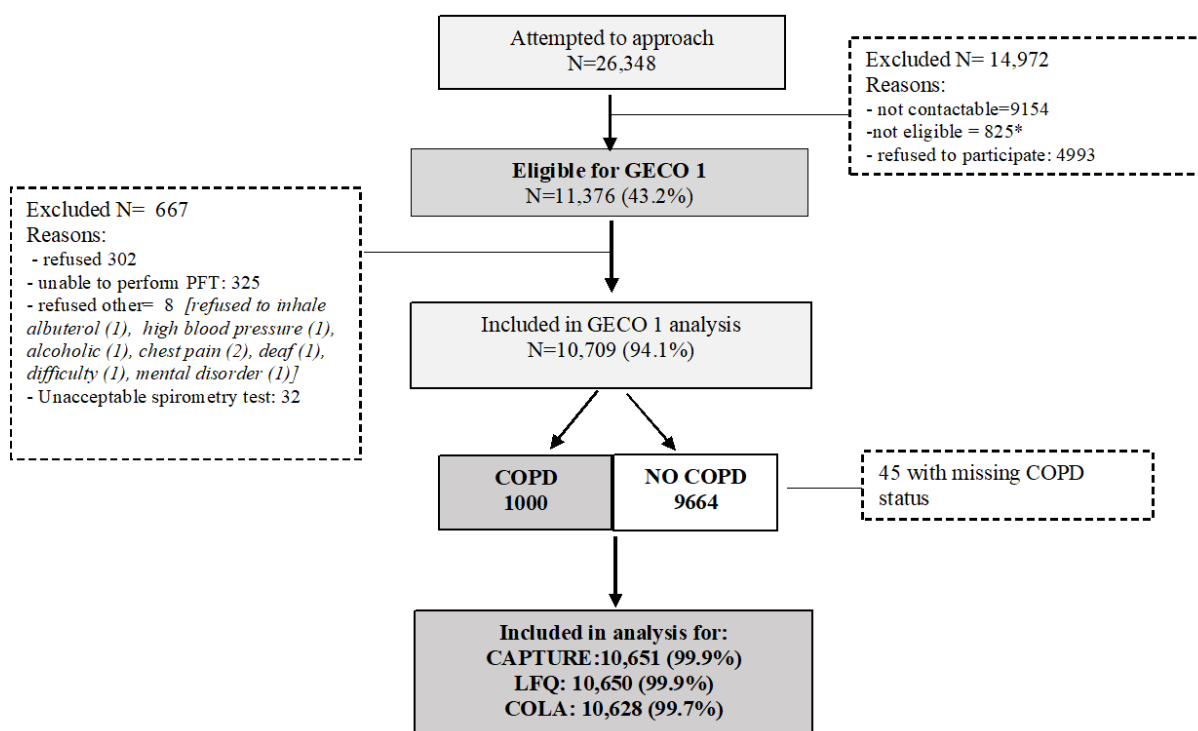

\* REASONS: Outside of age range = 70; Age missing: 114; Pregnant = 9; Active tuberculosis = 13; Taking medications for tuberculosis = 9; Surgery in past 3 months = 73; Heart attack in past 3 months = 22; Not capable of performing spirometry = 141; Not capable of understanding procedures = 36, Could not get informed consent = 50; died=1; Paralysis =4, Seizure disorder = 2; Other reasons = 281

FIGURE S1b: STARD Flow Diagram, Nepal

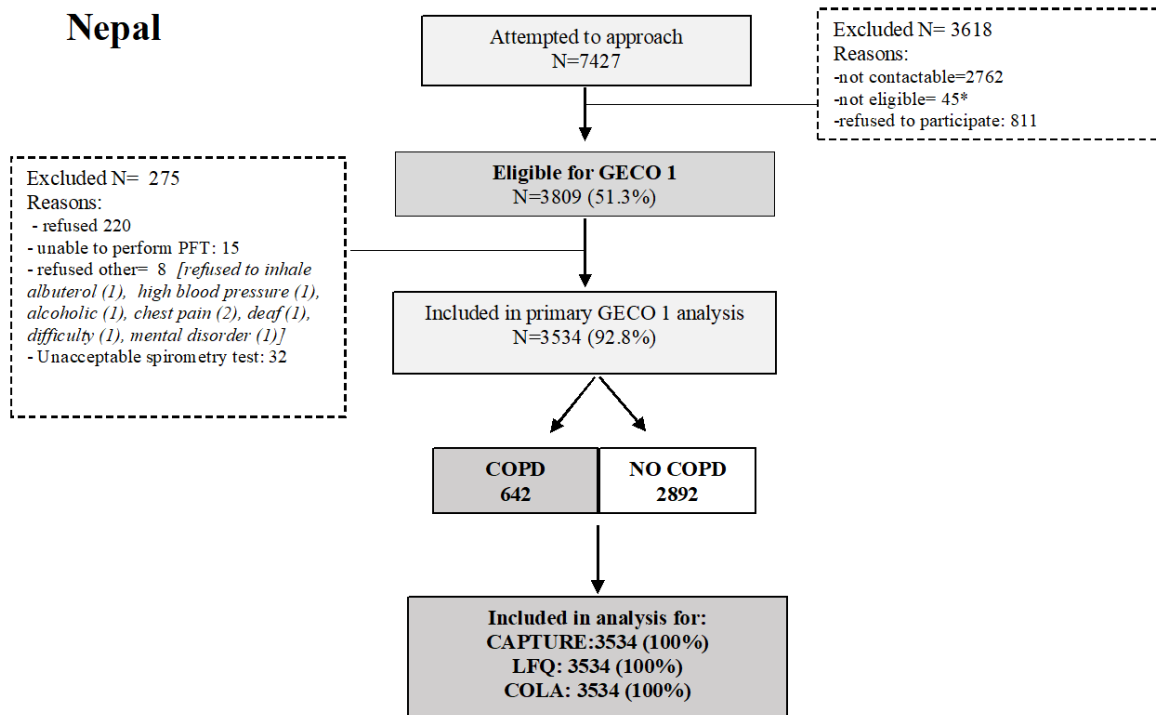

\* REASONS: not able to do spirometry=5 , under 40 years = 28, over 95 years= 1, Paralysis =4, Seizure disorder = 2, Surgery = 1, TB=4

FIGURE S1c: STARD Flow Diagram, Peru

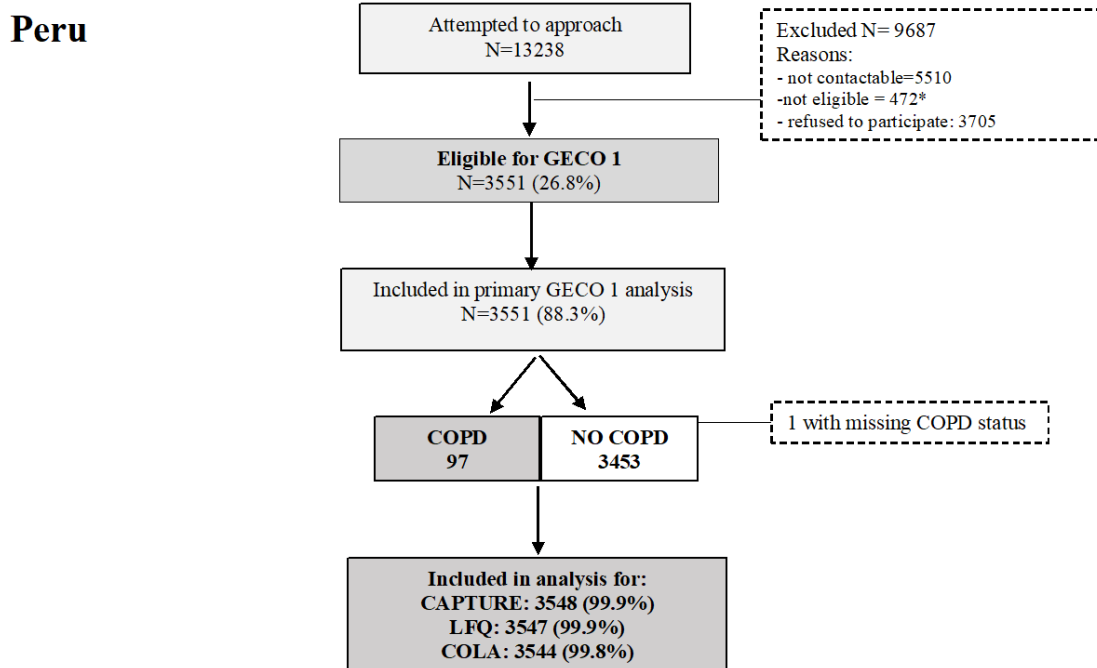

\* REASONS: Outside of age range = 6; Pregnant = 5; Active tuberculosis = 3; Taking medications for tuberculosis = 7; Surgery in past 3 months = 44; Heart attack in past 3 months = 12; Not capable of performing spirometry = 101; Not capable of understanding procedures = 36, Not capable of providing informed consent = 41; Other reasons = 217

**FIGURE S1d: STARD Flow Diagram, Uganda**

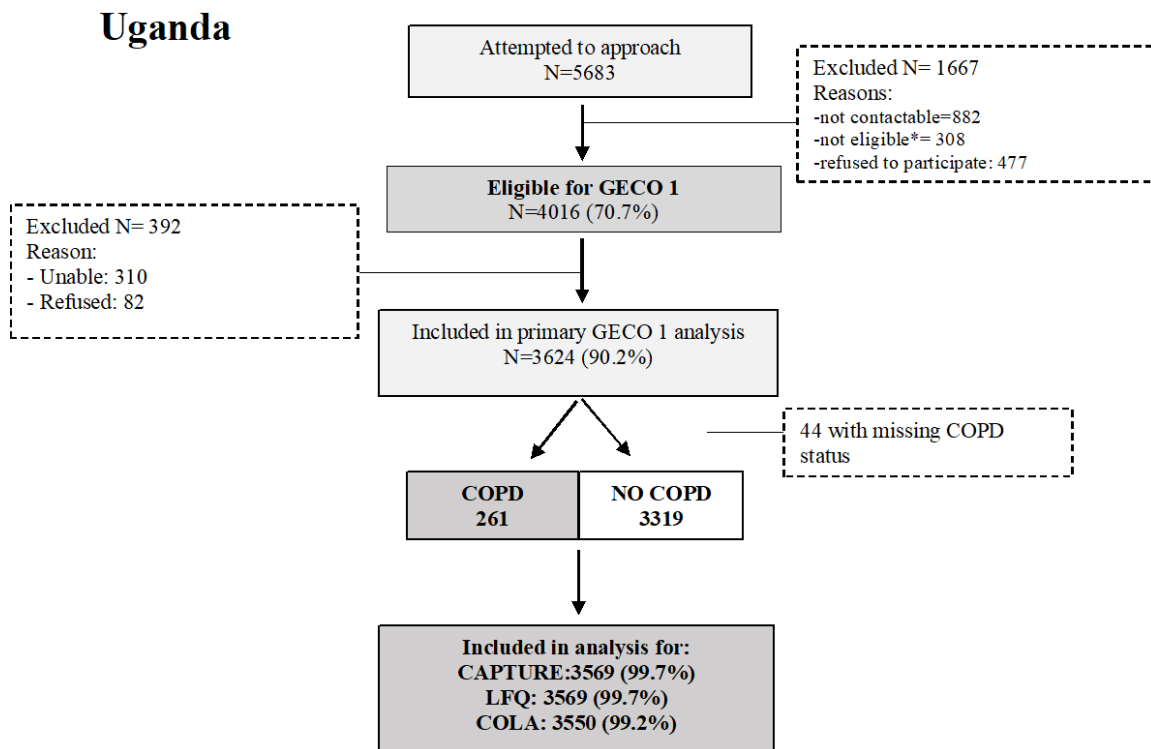

\*REASONS: Missing age: 114, Below 40Y: 31, Above 95Y: 4, Could not get informed consent: 9, Pregnant: 4, Had active TB: 6, On TB drug: 2, Had surgery: 28, Had MI: 10, Could not do spirometry: 35, Not eligible: 64, died: 1

## Supplemental Tables of Descriptive Analysis:

**eTable 1.** COPD Prevalence, Self-reported COPD Diagnosis, and COPD GOLD Classification by Site

| Variable                     | Level | Nepal        | Peru         | Uganda       | Missing % | Missing N |
|------------------------------|-------|--------------|--------------|--------------|-----------|-----------|
| <b>n</b>                     |       | 3534         | 3551         | 3624         |           |           |
| <b>COPD prevalence</b>       | No    | 2892 (81.83) | 3453 (97.27) | 3319 (92.71) | 0.4       | 45        |
|                              | Yes   | 642 (18.17)  | 97 (2.73)    | 261 (7.29)   |           |           |
| <b>Severity - GOLD (1-4)</b> | 1     | 453 (70.6)   | 23 (23.7)    | 30 (11.5)    | 0.0       | 0         |
|                              | 2     | 175 (27.3)   | 62 (63.9)    | 140 (53.2)   |           |           |
|                              | 3     | 2 (0.3)      | 0 (0.0)      | 14 (5.3)     |           |           |
|                              | 4     | 12 (1.87)    | 12 (12.37)   | 76 (29.23)   |           |           |
|                              |       |              |              |              |           |           |
| <b>Severity - GOLD (A-D)</b> | A     | 249 (38.8)   | 47 (48.5)    | 121 (46.4)   | 0.1       | 1         |
|                              | B     | 324 (50.5)   | 36 (37.1)    | 91 (34.9)    |           |           |
|                              | C     | 56 (8.7)     | 12 (12.4)    | 34 (13.0)    |           |           |
|                              | D     | 10 (1.6)     | 2 (2.1)      | 13 (5.0)     |           |           |

## Supplemental Tables and Figures for Diagnostic Accuracy Analysis

### A. Comparison of AUCs with continuous predictors (LFQ, CAPTURE, CAPTURE WITHOUT PEF, COLA)

#### *Unweighted AUCs*

**eTable 2.** Area Under the Curve (AUC) for Continuous Predictors (LFQ, CAPTURE, CAPTURE WITHOUT PEF, COLA)

|                        | Uganda |        |       | Nepal |        |       | Peru  |        |       |
|------------------------|--------|--------|-------|-------|--------|-------|-------|--------|-------|
|                        | AUC    | 95% CI |       | AUC   | 95% CI |       | AUC   | 95% CI |       |
| <b>LFQ</b>             | 0.760  | 0.726  | 0.793 | 0.789 | 0.770  | 0.808 | 0.720 | 0.668  | 0.771 |
| <b>CAPTURE W/O PEF</b> | 0.691  | 0.656  | 0.726 | 0.625 | 0.602  | 0.648 | 0.696 | 0.641  | 0.752 |
| <b>CAPTURE</b>         | 0.735  | 0.703  | 0.767 | 0.758 | 0.737  | 0.780 | 0.784 | 0.731  | 0.836 |
| <b>COLA</b>            | 0.756  | 0.724  | 0.788 | 0.792 | 0.773  | 0.811 | 0.773 | 0.727  | 0.820 |

## Weighted AUCs

**eTable 3.** Results for Weighted AUCs (and Their 95% CIs) Based on Census Information (Age Group and Sex)

|                        | Uganda |        |       | Nepal |        |       | Peru  |        |       |
|------------------------|--------|--------|-------|-------|--------|-------|-------|--------|-------|
|                        | AUC    | 95% CI |       | AUC   | 95% CI |       | AUC   | 95% CI |       |
| <b>LFQ</b>             | 0.753  | 0.719  | 0.791 | 0.790 | 0.771  | 0.810 | 0.717 | 0.677  | 0.774 |
| <b>CAPTURE W/O PEF</b> | 0.689  | 0.652  | 0.724 | 0.627 | 0.606  | 0.653 | 0.696 | 0.650  | 0.760 |
| <b>CAPTURE</b>         | 0.730  | 0.698  | 0.764 | 0.754 | 0.731  | 0.775 | 0.780 | 0.728  | 0.835 |
| <b>COLA</b>            | 0.752  | 0.716  | 0.783 | 0.791 | 0.770  | 0.809 | 0.771 | 0.724  | 0.818 |

### B. 2x2 tables for diagnostic accuracy estimates for binary predictors (CAPTURE, LFQ, COLA)

In this section, sensitivity, specificity, PPV, NPV, accuracy and diagnostic Odds Ratio (all with 95% confidence intervals) have been calculated for CAPTURE, LFQ, and COLA.

#### CAPTURE

We obtained a binary indicator for High/low risk of COPD combining CAPTURE and PEF as follows:

- CAPTURE score <2 is considered low risk;
- CAPTURE score =2/3/4 with PEF $\geq$ 250Lmin<sup>-1</sup> for Females or PEF $\geq$ 350min<sup>-1</sup> for Males will be considered low risk;
- CAPTURE score =2/3/4 with PEF<250Lmin<sup>-1</sup> for Females or PEF<350min<sup>-1</sup> for Males is considered high risk;
- CAPTURE score  $\geq$ 5 is considered high risk.

**eTable 4.** The 2x2 Contingency Tables of COPD Diagnosis and High/Low Risk Given by CAPTURE

|             | Uganda |       | Nepal |       | Peru  |       |
|-------------|--------|-------|-------|-------|-------|-------|
|             | COPD+  | COPD- | COPD+ | COPD- | COPD+ | COPD- |
| <b>High</b> | 136    | 692   | 413   | 734   | 51    | 380   |
| <b>Low</b>  | 125    | 2616  | 229   | 2158  | 46    | 3071  |

#### LFQ (Cutpoint = 18)

If the LFQ score is 18 or less, the patient is at risk for COPD.

**eTable 5.** The 2x2 Contingency Tables of COPD Diagnosis and High/Low Risk Given by a Cutoff of 18 for LFQ

|      | Uganda |       | Nepal |       | Peru  |       |
|------|--------|-------|-------|-------|-------|-------|
|      | COPD+  | COPD- | COPD+ | COPD- | COPD+ | COPD- |
| High | 149    | 592   | 385   | 508   | 63    | 1011  |
| Low  | 112    | 2716  | 257   | 2384  | 34    | 2439  |

**COLA (Cutpoint = 4)**

If the COLA score is 4 or more, the patient is at high risk for COPD.

**eTable 6.** The 2x2 Contingency Tables of COPD diagnosis and High/Low risk Given by a Cutoff of 4 for COLA.

|   | Uganda |       | Nepal |       | Peru  |       |
|---|--------|-------|-------|-------|-------|-------|
|   | COPD+  | COPD- | COPD+ | COPD- | COPD+ | COPD- |
| 1 | 169    | 846   | 252   | 181   | 35    | 276   |
| 0 | 91     | 2444  | 390   | 2711  | 62    | 3171  |



### C. Diagnostic performance of screening tools

#### *Characteristics of False Positives vs. True Negatives for CAPTURE*

**eTable 7a.** Characteristics of False Positives vs. True Negatives for CAPTURE in Uganda

| Variable                      | level  | Overall       | False Positives | True Negatives | p      | Missing % | Missing N |
|-------------------------------|--------|---------------|-----------------|----------------|--------|-----------|-----------|
| <b>n</b>                      |        | 3319          | 692             | 2616           |        |           |           |
| <b>Age</b>                    |        | 55.69 (11.98) | 59.81 (13.06)   | 54.58 (11.42)  | <0.001 | 0.0       | 0         |
| <b>Sex</b>                    | Male   | 1620 (48.81)  | 340 (49.13)     | 1275 (48.74)   | 0.887  | 0.0       | 0         |
|                               | Female | 1699 (51.19)  | 352 (50.87)     | 1341 (51.26)   |        |           |           |
| <b>Ever smoked</b>            | No     | 2817 (84.93)  | 560 (80.92)     | 2249 (86.04)   | 0.001  | 0.1       | 2         |
|                               | Yes    | 500 (15.07)   | 132 (19.08)     | 365 (13.96)    |        |           |           |
| <b>Current smoker</b>         | No     | 3024 (91.17)  | 614 (88.73)     | 2401 (91.85)   | 0.012  | 0.1       | 2         |
|                               | Yes    | 293 (8.83)    | 78 (11.27)      | 213 (8.15)     |        |           |           |
| <b>Ever used biomass</b>      | Yes    | 3319 (100.00) | 692 (100.00)    | 2616 (100.00)  | NA     | 0.0       | 0         |
| <b>Currently uses biomass</b> | No     | 580 (17.56)   | 121 (17.56)     | 458 (17.60)    | 1.000  | 0.5       | 16        |

| Variable                            | level | Overall       | False Positives | True Negatives | p     | Missing % | Missing N |
|-------------------------------------|-------|---------------|-----------------|----------------|-------|-----------|-----------|
|                                     | Yes   | 2723 ( 82.44) | 568 ( 82.44)    | 2145 ( 82.40)  |       |           |           |
| <b>Asthma Diagnosis</b>             | No    | 3304 ( 99.58) | 687 ( 99.28)    | 2606 ( 99.66)  | 0.301 | 0.0       | 1         |
|                                     | Yes   | 14 ( 0.42)    | 5 ( 0.72)       | 9 ( 0.34)      |       |           |           |
| <b>Tuberculosis history</b>         | No    | 3291 ( 99.19) | 686 ( 99.13)    | 2594 ( 99.20)  | 1.000 | 0.0       | 1         |
|                                     | Yes   | 27 ( 0.81)    | 6 ( 0.87)       | 21 ( 0.80)     |       |           |           |
| <b>Chronic bronchitis diagnosis</b> | No    | 3314 ( 99.88) | 690 ( 99.71)    | 2613 ( 99.92)  | 0.415 | 0.0       | 1         |
|                                     | Yes   | 4 ( 0.12)     | 2 ( 0.29)       | 2 ( 0.08)      |       |           |           |
| <b>Emphysema diagnosis</b>          | No    | 3318 (100.00) | 692 (100.00)    | 2615 (100.00)  | NA    | 0.0       | 1         |
| <b>Lung cancer diagnosis</b>        | No    | 3318 (100.00) | 692 (100.00)    | 2615 (100.00)  | NA    | 0.0       | 1         |

**eTable 7b.** False Positives vs. True Negatives for CAPTURE in Nepal

| Variable                      | level  | Overall       | False Positive | True Negative | p      | Missing % | Missing N |
|-------------------------------|--------|---------------|----------------|---------------|--------|-----------|-----------|
| <b>n</b>                      |        | 2892          | 734            | 2158          |        |           |           |
| <b>Age</b>                    |        | 54.62 (11.21) | 59.41 (11.84)  | 52.99 (10.50) | <0.001 | 0.0       | 0         |
| <b>Sex</b>                    | Male   | 1372 ( 47.44) | 314 ( 42.78)   | 1058 ( 49.03) | 0.004  | 0.0       | 0         |
|                               | Female | 1520 ( 52.56) | 420 ( 57.22)   | 1100 ( 50.97) |        |           |           |
| <b>Ever smoked</b>            | No     | 2099 ( 72.58) | 516 ( 70.30)   | 1583 ( 73.35) | 0.120  | 0.0       | 0         |
|                               | Yes    | 793 ( 27.42)  | 218 ( 29.70)   | 575 ( 26.65)  |        |           |           |
| <b>Current smoker</b>         | No     | 2386 ( 82.50) | 595 ( 81.06)   | 1791 ( 82.99) | 0.257  | 0.0       | 0         |
|                               | Yes    | 506 ( 17.50)  | 139 ( 18.94)   | 367 ( 17.01)  |        |           |           |
| <b>Ever used biomass</b>      | No     | 2 ( 0.07)     | 0 ( 0.00)      | 2 ( 0.09)     | 0.990  | 0.0       | 0         |
|                               | Yes    | 2890 ( 99.93) | 734 (100.00)   | 2156 ( 99.91) |        |           |           |
| <b>Currently uses biomass</b> | No     | 2752 ( 95.16) | 695 ( 94.69)   | 2057 ( 95.32) | 0.555  | 0.0       | 0         |
|                               | Yes    | 140 ( 4.84)   | 39 ( 5.31)     | 101 ( 4.68)   |        |           |           |

| Variable                            | level | Overall       | False Positive | True Negative | p      | Missing % | Missing N |
|-------------------------------------|-------|---------------|----------------|---------------|--------|-----------|-----------|
| <b>Asthma Diagnosis</b>             | No    | 2861 (98.93)  | 714 (97.28)    | 2147 (99.49)  | <0.001 | 0.0       | 0         |
|                                     | Yes   | 31 (1.07)     | 20 (2.72)      | 11 (0.51)     |        |           |           |
| <b>Tuberculosis history</b>         | No    | 2820 (97.51)  | 714 (97.28)    | 2106 (97.59)  | 0.737  | 0.0       | 0         |
|                                     | Yes   | 72 (2.49)     | 20 (2.72)      | 52 (2.41)     |        |           |           |
| <b>Chronic bronchitis diagnosis</b> | No    | 2890 (99.93)  | 734 (100.00)   | 2156 (99.91)  | 0.990  | 0.0       | 0         |
|                                     | Yes   | 2 (0.07)      | 0 (0.00)       | 2 (0.09)      |        |           |           |
| <b>Emphysema diagnosis</b>          | No    | 2891 (99.97)  | 733 (99.86)    | 2158 (100.00) | 0.572  | 0.0       | 0         |
|                                     | Yes   | 1 (0.03)      | 1 (0.14)       | 0 (0.00)      |        |           |           |
| <b>Lung cancer diagnosis</b>        | No    | 2892 (100.00) | 734 (100.00)   | 2158 (100.00) | NA     | 0.0       | 0         |

**eTable 7c.** False Positives vs. True Negatives for CAPTURE in Peru

| Variable                      | level  | Overall       | False Positive | True Negative | p      | Missing % | Missing N |
|-------------------------------|--------|---------------|----------------|---------------|--------|-----------|-----------|
| <b>n</b>                      |        | 3453          | 380            | 3071          |        |           |           |
| <b>Age</b>                    |        | 56.53 (11.28) | 63.97 (11.82)  | 55.62 (10.87) | <0.001 | 0.0       | 0         |
| <b>Sex</b>                    | Male   | 1722 ( 49.87) | 167 ( 43.95)   | 1553 ( 50.57) | 0.017  | 0.0       | 0         |
|                               | Female | 1731 ( 50.13) | 213 ( 56.05)   | 1518 ( 49.43) |        |           |           |
| <b>Ever smoked</b>            | No     | 1533 ( 44.40) | 201 ( 52.89)   | 1330 ( 43.31) | <0.001 | 0.0       | 0         |
|                               | Yes    | 1920 ( 55.60) | 179 ( 47.11)   | 1741 ( 56.69) |        |           |           |
| <b>Current smoker</b>         | No     | 2914 ( 84.41) | 351 ( 92.37)   | 2561 ( 83.42) | <0.001 | 0.0       | 1         |
|                               | Yes    | 538 ( 15.59)  | 29 ( 7.63)     | 509 ( 16.58)  |        |           |           |
| <b>Ever used biomass</b>      | Yes    | 3453 (100.00) | 380 (100.00)   | 3071 (100.00) | NA     | 0.0       | 0         |
| <b>Currently uses biomass</b> | No     | 3435 ( 99.54) | 375 ( 98.94)   | 3058 ( 99.61) | 0.163  | 0.1       | 2         |
|                               | Yes    | 16 ( 0.46)    | 4 ( 1.06)      | 12 ( 0.39)    |        |           |           |
| <b>Asthma Diagnosis</b>       | No     | 3231 ( 93.60) | 321 ( 84.47)   | 2908 ( 94.72) | <0.001 | 0.0       | 1         |

| Variable                            | level | Overall       | False Positive | True Negative | p     | Missing % | Missing N |
|-------------------------------------|-------|---------------|----------------|---------------|-------|-----------|-----------|
|                                     | Yes   | 221 ( 6.40)   | 59 ( 15.53)    | 162 ( 5.28)   |       |           |           |
| <b>Tuberculosis history</b>         | No    | 3204 ( 92.84) | 342 ( 90.24)   | 2860 ( 93.16) | 0.048 | 0.1       | 2         |
|                                     | Yes   | 247 ( 7.16)   | 37 ( 9.76)     | 210 ( 6.84)   |       |           |           |
| <b>Chronic bronchitis diagnosis</b> | No    | 3363 ( 97.45) | 362 ( 95.26)   | 2999 ( 97.72) | 0.007 | 0.1       | 2         |
|                                     | Yes   | 88 ( 2.55)    | 18 ( 4.74)     | 70 ( 2.28)    |       |           |           |
| <b>Emphysema diagnosis</b>          | No    | 3450 ( 99.97) | 379 (100.00)   | 3069 ( 99.97) | 1.000 | 0.1       | 2         |
|                                     | Yes   | 1 ( 0.03)     | 0 ( 0.00)      | 1 ( 0.03)     |       |           |           |
| <b>Lung cancer diagnosis</b>        | No    | 3452 (100.00) | 380 (100.00)   | 3070 (100.00) | NA    | 0.0       | 1         |

## Characteristics of False Negatives vs. True Positives for CAPTURE

**eTable 8a.** False Negatives vs. True Positives for CAPTURE in Uganda

| Variable                      | level  | Overall       | False Negative | True Positive | p      | Missing % | Missing N |
|-------------------------------|--------|---------------|----------------|---------------|--------|-----------|-----------|
| <b>n</b>                      |        | 261           | 125            | 136           |        |           |           |
| <b>Age</b>                    |        | 61.08 (12.98) | 57.86 (12.07)  | 64.04 (13.13) | <0.001 | 0.0       | 0         |
| <b>Sex</b>                    | Male   | 137 ( 52.49)  | 58 ( 46.40)    | 79 ( 58.09)   | 0.078  | 0.0       | 0         |
|                               | Female | 124 ( 47.51)  | 67 ( 53.60)    | 57 ( 41.91)   |        |           |           |
| <b>Ever Smoked</b>            | No     | 167 ( 64.23)  | 83 ( 66.94)    | 84 ( 61.76)   | 0.460  | 0.4       | 1         |
|                               | Yes    | 93 ( 35.77)   | 41 ( 33.06)    | 52 ( 38.24)   |        |           |           |
| <b>Current smoker</b>         | No     | 198 ( 76.15)  | 99 ( 79.84)    | 99 ( 72.79)   | 0.236  | 0.4       | 1         |
|                               | Yes    | 62 ( 23.85)   | 25 ( 20.16)    | 37 ( 27.21)   |        |           |           |
| <b>Ever used biomass</b>      | Yes    | 261 (100.00)  | 125 (100.00)   | 136 (100.00)  | NA     | 0.0       | 0         |
| <b>Currently uses biomass</b> | No     | 52 ( 19.92)   | 24 ( 19.20)    | 28 ( 20.59)   | 0.900  | 0.0       | 0         |
|                               | Yes    | 209 ( 80.08)  | 101 ( 80.80)   | 108 ( 79.41)  |        |           |           |

| Variable                     | level | Overall      | False Negative | True Positive | p      | Missing % | Missing N |
|------------------------------|-------|--------------|----------------|---------------|--------|-----------|-----------|
| <b>Severity – GOLD (1-4)</b> | 1     | 77 ( 29.50)  | 44 ( 35.20)    | 33 ( 24.26)   | 0.020  | 0.0       | 0         |
|                              | 2     | 149 ( 57.09) | 72 ( 57.60)    | 77 ( 56.62)   |        |           |           |
|                              | 3     | 29 ( 11.11)  | 8 ( 6.40)      | 21 ( 15.44)   |        |           |           |
|                              | 4     | 6 ( 2.30)    | 1 ( 0.80)      | 5 ( 3.68)     |        |           |           |
| <b>GOLD 1,2 vs. 3,4</b>      | 1-2   | 226 (86.59)  | 116 (92.80)    | 110 (80.88)   | 0.008  | 0.0       | 0         |
|                              | 3-4   | 35 (13.41)   | 9 (7.20)       | 26 (19.12)    |        |           |           |
| <b>Severity – GOLD (A-D)</b> | A     | 30 ( 11.54)  | 24 ( 19.35)    | 6 ( 4.41)     | <0.001 | 0.4       | 1         |
|                              | B     | 140 ( 53.85) | 71 ( 57.26)    | 69 ( 50.74)   |        |           |           |
|                              | C     | 14 ( 5.38)   | 10 ( 8.06)     | 4 ( 2.94)     |        |           |           |
|                              | D     | 76 ( 29.23)  | 19 ( 15.32)    | 57 ( 41.91)   |        |           |           |
| <b>GOLD A vs. B,C,D</b>      | A     | 30 (11.54)   | 24 (19.35)     | 6 (4.41)      | <0.001 | 0.4       | 1         |
|                              | B-C-D | 230 (88.46)  | 100 (80.65)    | 130 (95.59)   |        |           |           |



| Variable                            | level | Overall      | False Negative | True Positive | p     | Missing % | Missing N |
|-------------------------------------|-------|--------------|----------------|---------------|-------|-----------|-----------|
| <b>Asthma diagnosis</b>             | No    | 247 ( 95.00) | 122 ( 98.39)   | 125 ( 91.91)  | 0.035 | 0.4       | 1         |
|                                     | Yes   | 13 ( 5.00)   | 2 ( 1.61)      | 11 ( 8.09)    |       |           |           |
| <b>Tuberculosis history</b>         | No    | 249 ( 95.77) | 121 ( 97.58)   | 128 ( 94.12)  | 0.281 | 0.4       | 1         |
|                                     | Yes   | 11 ( 4.23)   | 3 ( 2.42)      | 8 ( 5.88)     |       |           |           |
| <b>Chronic bronchitis diagnosis</b> | No    | 258 ( 99.23) | 123 ( 99.19)   | 135 ( 99.26)  | 1.000 | 0.4       | 1         |
|                                     | Yes   | 2 ( 0.77)    | 1 ( 0.81)      | 1 ( 0.74)     |       |           |           |
| <b>Emphysema diagnosis</b>          | No    | 259 ( 99.62) | 124 (100.00)   | 135 ( 99.26)  | 1.000 | 0.4       | 1         |
|                                     | Yes   | 1 ( 0.38)    | 0 ( 0.00)      | 1 ( 0.74)     |       |           |           |
| <b>Lung cancer diagnosis</b>        | No    | 260 (100.00) | 124 (100.00)   | 136 (100.00)  | NA    | 0.4       | 1         |

**eTable 8b.** False Negatives vs. True Positives for CAPTURE in Nepal

| Variable                      | level  | Overall       | False Negative | True Positive | p      | Missing % | Missing N |
|-------------------------------|--------|---------------|----------------|---------------|--------|-----------|-----------|
| <b>n</b>                      |        | 642           | 229            | 413           |        |           |           |
| <b>Age</b>                    |        | 63.31 (11.17) | 60.17 (11.86)  | 65.04 (10.38) | <0.001 | 0.0       | 0         |
| <b>Sex</b>                    | Male   | 393 ( 61.21)  | 150 ( 65.50)   | 243 ( 58.84)  | 0.115  | 0.0       | 0         |
|                               | Female | 249 ( 38.79)  | 79 ( 34.50)    | 170 ( 41.16)  |        |           |           |
| <b>Ever smoked</b>            | No     | 287 ( 44.70)  | 92 ( 40.17)    | 195 ( 47.22)  | 0.102  | 0.0       | 0         |
|                               | Yes    | 355 ( 55.30)  | 137 ( 59.83)   | 218 ( 52.78)  |        |           |           |
| <b>Current smoker</b>         | No     | 421 ( 65.58)  | 132 ( 57.64)   | 289 ( 69.98)  | 0.002  | 0.0       | 0         |
|                               | Yes    | 221 ( 34.42)  | 97 ( 42.36)    | 124 ( 30.02)  |        |           |           |
| <b>Ever used biomass</b>      | Yes    | 642 (100.00)  | 229 (100.00)   | 413 (100.00)  | NA     | 0.0       | 0         |
| <b>Currently uses biomass</b> | No     | 595 ( 92.68)  | 219 ( 95.63)   | 376 ( 91.04)  | 0.048  | 0.0       | 0         |
|                               | Yes    | 47 ( 7.32)    | 10 ( 4.37)     | 37 ( 8.96)    |        |           |           |
| <b>Severity – GOLD (1-4)</b>  | 1      | 218 ( 33.96)  | 120 ( 52.40)   | 98 ( 23.73)   | <0.001 | 0.0       | 0         |

| Variable                     | level | Overall      | False Negative | True Positive | p      | Missing % | Missing N |
|------------------------------|-------|--------------|----------------|---------------|--------|-----------|-----------|
|                              | 2     | 310 ( 48.29) | 94 ( 41.05)    | 216 ( 52.30)  |        |           |           |
|                              | 3     | 97 ( 15.11)  | 15 ( 6.55)     | 82 ( 19.85)   |        |           |           |
|                              | 4     | 17 ( 2.65)   | 0 ( 0.00)      | 17 ( 4.12)    |        |           |           |
| <b>GOLD 1,2 vs 3,4</b>       | 1-2   | 528 (82.24)  | 214 (93.45)    | 314 (76.03)   | <0.001 | 0.0       | 0         |
|                              | 3-4   | 114 (17.76)  | 15 (6.55)      | 99 (23.97)    |        |           |           |
| <b>Severity – GOLD (A-D)</b> | A     | 453 ( 70.56) | 203 ( 88.65)   | 250 ( 60.53)  | <0.001 | 0.0       | 0         |
|                              | B     | 175 ( 27.26) | 24 ( 10.48)    | 151 ( 36.56)  |        |           |           |
|                              | C     | 2 ( 0.31)    | 1 ( 0.44)      | 1 ( 0.24)     |        |           |           |
|                              | D     | 12 ( 1.87)   | 1 ( 0.44)      | 11 ( 2.66)    |        |           |           |
| <b>GOLD A vs. B,C,D</b>      | A     | 453 (70.56)  | 203 (88.65)    | 250 (60.53)   | <0.001 | 0.0       | 0         |
|                              | B-C-D | 189 (29.44)  | 26 (11.35)     | 163 (39.47)   |        |           |           |
| <b>Asthma diagnosis</b>      | No    | 542 ( 84.42) | 216 ( 94.32)   | 326 ( 78.93)  | <0.001 | 0.0       | 0         |

| Variable                            | level | Overall      | False Negative | True Positive | p     | Missing % | Missing N |
|-------------------------------------|-------|--------------|----------------|---------------|-------|-----------|-----------|
|                                     | Yes   | 100 ( 15.58) | 13 ( 5.68)     | 87 ( 21.07)   |       |           |           |
| <b>Tuberculosis history</b>         | No    | 601 ( 93.61) | 216 ( 94.32)   | 385 ( 93.22)  | 0.705 | 0.0       | 0         |
|                                     | Yes   | 41 ( 6.39)   | 13 ( 5.68)     | 28 ( 6.78)    |       |           |           |
| <b>Chronic bronchitis diagnosis</b> | No    | 637 ( 99.22) | 228 ( 99.56)   | 409 ( 99.03)  | 0.790 | 0.0       | 0         |
|                                     | Yes   | 5 ( 0.78)    | 1 ( 0.44)      | 4 ( 0.97)     |       |           |           |
| <b>Emphysema diagnosis</b>          | No    | 641 ( 99.84) | 229 (100.00)   | 412 ( 99.76)  | 1.000 | 0.0       | 0         |
|                                     | Yes   | 1 ( 0.16)    | 0 ( 0.00)      | 1 ( 0.24)     |       |           |           |
| <b>Lung cancer diagnosis</b>        | No    | 642 (100.00) | 229 (100.00)   | 413 (100.00)  | NA    | 0.0       | 0         |

**eTable 8c.** False Negatives vs. True Positives for CAPTURE in Peru

| Variable                      | level  | Overall       | False Negative | True Positive | p     | Missing % | Missing N |
|-------------------------------|--------|---------------|----------------|---------------|-------|-----------|-----------|
| <b>n</b>                      |        | 97            | 46             | 51            |       |           |           |
| <b>Age</b>                    |        | 60.26 (12.15) | 58.46 (12.21)  | 61.88 (11.99) | 0.167 | 0.0       | 0         |
| <b>Sex</b>                    | Male   | 61 ( 62.89)   | 29 ( 63.04)    | 32 ( 62.75)   | 1.000 | 0.0       | 0         |
|                               | Female | 36 ( 37.11)   | 17 ( 36.96)    | 19 ( 37.25)   |       |           |           |
| <b>Ever Smoked</b>            | No     | 42 ( 43.30)   | 15 ( 32.61)    | 27 ( 52.94)   | 0.070 | 0.0       | 0         |
|                               | Yes    | 55 ( 56.70)   | 31 ( 67.39)    | 24 ( 47.06)   |       |           |           |
| <b>Current smoker</b>         | No     | 76 ( 78.35)   | 31 ( 67.39)    | 45 ( 88.24)   | 0.025 | 0.0       | 0         |
|                               | Yes    | 21 ( 21.65)   | 15 ( 32.61)    | 6 ( 11.76)    |       |           |           |
| <b>Ever used biomass</b>      | Yes    | 97 (100.00)   | 46 (100.00)    | 51 (100.00)   | NA    | 0.0       | 0         |
| <b>Currently uses biomass</b> | No     | 97 (100.00)   | 46 (100.00)    | 51 (100.00)   | NA    | 0.0       | 0         |
| <b>Severity – GOLD (1-4)</b>  | 1      | 50 ( 51.55)   | 33 ( 71.74)    | 17 ( 33.33)   | 0.002 | 0.0       | 0         |
|                               | 2      | 33 ( 34.02)   | 10 ( 21.74)    | 23 ( 45.10)   |       |           |           |

| Variable                     | level | Overall     | False Negative | True Positive | p     | Missing % | Missing N |
|------------------------------|-------|-------------|----------------|---------------|-------|-----------|-----------|
|                              | 3     | 12 ( 12.37) | 3 ( 6.52)      | 9 ( 17.65)    |       |           |           |
|                              | 4     | 2 ( 2.06)   | 0 ( 0.00)      | 2 ( 3.92)     |       |           |           |
| <b>GOLD 1,2 vs. 3,4</b>      | 1-2   | 83 (85.57)  | 43 (93.48)     | 40 (78.43)    | 0.069 | 0.0       | 0         |
|                              | 3-4   | 14 (14.43)  | 3 (6.52)       | 11 (21.57)    |       |           |           |
| <b>Severity – GOLD (A-D)</b> | A     | 23 ( 23.71) | 16 ( 34.78)    | 7 ( 13.73)    | 0.044 | 0.0       | 0         |
|                              | B     | 62 ( 63.92) | 26 ( 56.52)    | 36 ( 70.59)   |       |           |           |
|                              | D     | 12 ( 12.37) | 4 ( 8.70)      | 8 ( 15.69)    |       |           |           |
| <b>GOLD A vs. B,C,D</b>      | A     | 23 (23.71)  | 16 (34.78)     | 7 (13.73)     | 0.029 | 0.0       | 0         |
|                              | B-C-D | 74 (76.29)  | 30 (65.22)     | 44 (86.27)    |       |           |           |
| <b>Asthma diagnosis</b>      | No    | 63 ( 64.95) | 35 ( 76.09)    | 28 ( 54.90)   | 0.049 | 0.0       | 0         |
|                              | Yes   | 34 ( 35.05) | 11 ( 23.91)    | 23 ( 45.10)   |       |           |           |
| <b>Tuberculosis history</b>  | No    | 65 ( 67.01) | 33 ( 71.74)    | 32 ( 62.75)   | 0.469 | 0.0       | 0         |

| Variable                            | level | Overall     | False Negative | True Positive | p     | Missing % | Missing N |
|-------------------------------------|-------|-------------|----------------|---------------|-------|-----------|-----------|
|                                     | Yes   | 32 ( 32.99) | 13 ( 28.26)    | 19 ( 37.25)   |       |           |           |
| <b>Chronic bronchitis diagnosis</b> | No    | 82 ( 84.54) | 43 ( 93.48)    | 39 ( 76.47)   | 0.042 | 0.0       | 0         |
|                                     | Yes   | 15 ( 15.46) | 3 ( 6.52)      | 12 ( 23.53)   |       |           |           |
| <b>Emphysema diagnosis</b>          | No    | 96 ( 98.97) | 45 ( 97.83)    | 51 (100.00)   | 0.959 | 0.0       | 0         |
|                                     | Yes   | 1 ( 1.03)   | 1 ( 2.17)      | 0 ( 0.00)     |       |           |           |
| <b>Lung cancer diagnosis</b>        | No    | 97 (100.00) | 46 (100.00)    | 51 (100.00)   | NA    | 0.0       | 0         |

**Characteristics of False Positives vs. True Negatives for LFQ (Cutpoint = 18)**

**eTable 9a.** False Positives vs. True Negatives for LFQ in Uganda

| Variable                      | level  | Overall       | False Positive | True Negative | p      | Missing % | Missing N |
|-------------------------------|--------|---------------|----------------|---------------|--------|-----------|-----------|
| <b>n</b>                      |        | 3319          | 592            | 2716          |        |           |           |
| <b>Age</b>                    |        | 55.69 (11.98) | 65.99 (12.06)  | 53.43 (10.71) | <0.001 | 0.0       | 0         |
| <b>Sex</b>                    | Male   | 1620 ( 48.81) | 311 ( 52.53)   | 1304 ( 48.01) | 0.051  | 0.0       | 0         |
|                               | Female | 1699 ( 51.19) | 281 ( 47.47)   | 1412 ( 51.99) |        |           |           |
| <b>Ever Smoked</b>            | No     | 2817 ( 84.93) | 335 ( 56.59)   | 2474 ( 91.16) | <0.001 | 0.1       | 2         |
|                               | Yes    | 500 ( 15.07)  | 257 ( 43.41)   | 240 ( 8.84)   |        |           |           |
| <b>Current smoker</b>         | No     | 3024 ( 91.17) | 426 ( 71.96)   | 2589 ( 95.39) | <0.001 | 0.1       | 2         |
|                               | Yes    | 293 ( 8.83)   | 166 ( 28.04)   | 125 ( 4.61)   |        |           |           |
| <b>Ever used biomass</b>      | Yes    | 3319 (100.00) | 592 (100.00)   | 2716 (100.00) | NA     | 0.0       | 0         |
| <b>Currently uses biomass</b> | No     | 580 ( 17.56)  | 120 ( 20.41)   | 459 ( 16.97)  | 0.055  | 0.5       | 16        |
|                               | Yes    | 2723 ( 82.44) | 468 ( 79.59)   | 2245 ( 83.03) |        |           |           |



| Variable                     | level | Overall       | False Positive | True Negative | p      | Missing % | Missing N |
|------------------------------|-------|---------------|----------------|---------------|--------|-----------|-----------|
| Asthma diagnosis             | No    | 3304 ( 99.58) | 587 ( 99.16)   | 2706 ( 99.67) | 0.164  | 0.0       | 1         |
|                              | Yes   | 14 ( 0.42)    | 5 ( 0.84)      | 9 ( 0.33)     |        |           |           |
| Tuberculosis diagnosis       | No    | 3291 ( 99.19) | 582 ( 98.31)   | 2698 ( 99.37) | 0.019  | 0.0       | 1         |
|                              | Yes   | 27 ( 0.81)    | 10 ( 1.69)     | 17 ( 0.63)    |        |           |           |
| Chronic bronchitis diagnosis | No    | 3314 ( 99.88) | 588 ( 99.32)   | 2715 (100.00) | <0.001 | 0.0       | 1         |
|                              | Yes   | 4 ( 0.12)     | 4 ( 0.68)      | 0 ( 0.00)     |        |           |           |
| Emphysema diagnosis          | No    | 3318 (100.00) | 592 (100.00)   | 2715 (100.00) | NA     | 0.0       | 1         |
| Lung cancer diagnosis        | No    | 3318 (100.00) | 592 (100.00)   | 2715 (100.00) | NA     | 0.0       | 1         |

**eTable 9b.** False Positives vs. True Negatives for LFQ in Nepal

| Variable                            | level  | Overall       | False Positive | True Negative | p      | Missing % | Missing N |
|-------------------------------------|--------|---------------|----------------|---------------|--------|-----------|-----------|
| <b>n</b>                            |        | 2892          | 508            | 2384          |        |           |           |
| <b>Age</b>                          |        | 54.62 (11.21) | 64.26 (10.16)  | 52.57 (10.31) | <0.001 | 0.0       | 0         |
| <b>Sex</b>                          | Male   | 1372 ( 47.44) | 344 ( 67.72)   | 1028 ( 43.12) | <0.001 | 0.0       | 0         |
|                                     | Female | 1520 ( 52.56) | 164 ( 32.28)   | 1356 ( 56.88) |        |           |           |
| <b>Ever Smoked</b>                  | No     | 2099 ( 72.58) | 134 ( 26.38)   | 1965 ( 82.42) | <0.001 | 0.0       | 0         |
|                                     | Yes    | 793 ( 27.42)  | 374 ( 73.62)   | 419 ( 17.58)  |        |           |           |
| <b>Current smoker</b>               | No     | 2386 ( 82.50) | 261 ( 51.38)   | 2125 ( 89.14) | <0.001 | 0.0       | 0         |
|                                     | Yes    | 506 ( 17.50)  | 247 ( 48.62)   | 259 ( 10.86)  |        |           |           |
| <b>Ever used biomass</b>            | No     | 2 ( 0.07)     | 0 ( 0.00)      | 2 ( 0.08)     | 1.000  | 0.0       | 0         |
|                                     | Yes    | 2890 ( 99.93) | 508 (100.00)   | 2382 ( 99.92) |        |           |           |
| <b>Currently uses biomass</b>       | No     | 2752 ( 95.16) | 464 ( 91.34)   | 2288 ( 95.97) | <0.001 | 0.0       | 0         |
|                                     | Yes    | 140 ( 4.84)   | 44 ( 8.66)     | 96 ( 4.03)    |        |           |           |
| <b>Asthma diagnosis</b>             | No     | 2861 ( 98.93) | 485 ( 95.47)   | 2376 ( 99.66) | <0.001 | 0.0       | 0         |
|                                     | Yes    | 31 ( 1.07)    | 23 ( 4.53)     | 8 ( 0.34)     |        |           |           |
| <b>Tuberculosis history</b>         | No     | 2820 ( 97.51) | 488 ( 96.06)   | 2332 ( 97.82) | 0.032  | 0.0       | 0         |
|                                     | Yes    | 72 ( 2.49)    | 20 ( 3.94)     | 52 ( 2.18)    |        |           |           |
| <b>Chronic bronchitis diagnosis</b> | No     | 2890 ( 99.93) | 506 ( 99.61)   | 2384 (100.00) | 0.033  | 0.0       | 0         |
|                                     | Yes    | 2 ( 0.07)     | 2 ( 0.39)      | 0 ( 0.00)     |        |           |           |
| <b>Emphysema diagnosis</b>          | No     | 2891 ( 99.97) | 508 (100.00)   | 2383 ( 99.96) | 1.000  | 0.0       | 0         |
|                                     | Yes    | 1 ( 0.03)     | 0 ( 0.00)      | 1 ( 0.04)     |        |           |           |
| <b>Lung cancer diagnosis</b>        | No     | 2892 (100.00) | 508 (100.00)   | 2384 (100.00) | NA     | 0.0       | 0         |

**eTable 9c.** False Positives vs. True Negatives for LFQ in Peru

| Variable                      | level  | Overall       | False Positive | True Negative | p      | Missing % | Missing N |
|-------------------------------|--------|---------------|----------------|---------------|--------|-----------|-----------|
| <b>n</b>                      |        | 3453          | 1011           | 2439          |        |           |           |
| <b>Age</b>                    |        | 56.53 (11.28) | 62.53 (10.99)  | 54.04 (10.43) | <0.001 | 0.0       | 0         |
| <b>Sex</b>                    | Male   | 1722 (49.87)  | 614 (60.73)    | 1106 (45.35)  | <0.001 | 0.0       | 0         |
|                               | Female | 1731 (50.13)  | 397 (39.27)    | 1333 (54.65)  |        |           |           |
| <b>Ever Smoked</b>            | No     | 1533 (44.40)  | 239 (23.64)    | 1293 (53.01)  | <0.001 | 0.0       | 0         |
|                               | Yes    | 1920 (55.60)  | 772 (76.36)    | 1146 (46.99)  |        |           |           |
| <b>Current smoker</b>         | No     | 2914 (84.41)  | 747 (73.89)    | 2165 (88.80)  | <0.001 | 0.0       | 1         |
|                               | Yes    | 538 (15.59)   | 264 (26.11)    | 273 (11.20)   |        |           |           |
| <b>Ever used biomass</b>      | Yes    | 3453 (100.00) | 1011 (100.00)  | 2439 (100.00) | NA     | 0.0       | 0         |
| <b>Currently uses biomass</b> | No     | 3435 (99.54)  | 1005 (99.50)   | 2427 (99.55)  | 1.000  | 0.1       | 2         |
|                               | Yes    | 16 (0.46)     | 5 (0.50)       | 11 (0.45)     |        |           |           |
| <b>Asthma diagnosis</b>       | No     | 3231 (93.60)  | 904 (89.42)    | 2324 (95.32)  | <0.001 | 0.0       | 1         |

| Variable                            | level | Overall       | False Positive | True Negative | p     | Missing % | Missing N |
|-------------------------------------|-------|---------------|----------------|---------------|-------|-----------|-----------|
|                                     | Yes   | 221 ( 6.40)   | 107 ( 10.58)   | 114 ( 4.68)   |       |           |           |
| <b>Tuberculosis history</b>         | No    | 3204 ( 92.84) | 928 ( 91.88)   | 2273 ( 93.23) | 0.184 | 0.1       | 2         |
|                                     | Yes   | 247 ( 7.16)   | 82 ( 8.12)     | 165 ( 6.77)   |       |           |           |
| <b>Chronic bronchitis diagnosis</b> | No    | 3363 ( 97.45) | 973 ( 96.24)   | 2387 ( 97.95) | 0.006 | 0.1       | 2         |
|                                     | Yes   | 88 ( 2.55)    | 38 ( 3.76)     | 50 ( 2.05)    |       |           |           |
| <b>Emphysema diagnosis</b>          | No    | 3450 ( 99.97) | 1009 (100.00)  | 2438 ( 99.96) | 1.000 | 0.1       | 2         |
|                                     | Yes   | 1 ( 0.03)     | 0 ( 0.00)      | 1 ( 0.04)     |       |           |           |
| <b>Lung cancer diagnosis</b>        | No    | 3452 (100.00) | 1011 (100.00)  | 2438 (100.00) | NA    | 0.0       | 1         |

**Characteristics of False Negatives vs. True Positives for LFQ (Cutpoint = 18)**

**eTable 10a.** False Negatives vs. True Positives for LFQ in Uganda

| Variable                      | level  | Overall       | False Negative | True Positive | p      | Missing % | Missing N |
|-------------------------------|--------|---------------|----------------|---------------|--------|-----------|-----------|
| <b>n</b>                      |        | 261           | 112            | 149           |        |           |           |
| <b>Age</b>                    |        | 61.08 (12.98) | 54.85 (11.60)  | 65.77 (11.99) | <0.001 | 0.0       | 0         |
| <b>Sex</b>                    | Male   | 137 ( 52.49)  | 47 ( 41.96)    | 90 ( 60.40)   | 0.005  | 0.0       | 0         |
|                               | Female | 124 ( 47.51)  | 65 ( 58.04)    | 59 ( 39.60)   |        |           |           |
| <b>Ever Smoked</b>            | No     | 167 ( 64.23)  | 94 ( 84.68)    | 73 ( 48.99)   | <0.001 | 0.4       | 1         |
|                               | Yes    | 93 ( 35.77)   | 17 ( 15.32)    | 76 ( 51.01)   |        |           |           |
| <b>Current smoker</b>         | No     | 198 ( 76.15)  | 103 ( 92.79)   | 95 ( 63.76)   | <0.001 | 0.4       | 1         |
|                               | Yes    | 62 ( 23.85)   | 8 ( 7.21)      | 54 ( 36.24)   |        |           |           |
| <b>Ever used biomass</b>      | Yes    | 261 (100.00)  | 112 (100.00)   | 149 (100.00)  | NA     | 0.0       | 0         |
| <b>Currently uses biomass</b> | No     | 52 ( 19.92)   | 22 ( 19.64)    | 30 ( 20.13)   | 1.000  | 0.0       | 0         |
|                               | Yes    | 209 ( 80.08)  | 90 ( 80.36)    | 119 ( 79.87)  |        |           |           |
| <b>Severity - GOLD (1-4)</b>  | 1      | 77 ( 29.50)   | 39 ( 34.82)    | 38 ( 25.50)   | 0.027  | 0.0       | 0         |
|                               | 2      | 149 ( 57.09)  | 65 ( 58.04)    | 84 ( 56.38)   |        |           |           |
|                               | 3      | 29 ( 11.11)   | 8 ( 7.14)      | 21 ( 14.09)   |        |           |           |

| Variable                            | level | Overall      | False Negative | True Positive | p      | Missing % | Missing N |
|-------------------------------------|-------|--------------|----------------|---------------|--------|-----------|-----------|
|                                     | 4     | 6 ( 2.30)    | 0 ( 0.00)      | 6 ( 4.03)     |        |           |           |
| <b>GOLD 1,2 vs. 3,4</b>             | 1-2   | 226 (86.59)  | 104 (92.86)    | 122 (81.88)   | 0.017  | 0.0       | 0         |
|                                     | 3-4   | 35 (13.41)   | 8 (7.14)       | 27 (18.12)    |        |           |           |
| <b>Severity - GOLD (A-D)</b>        | A     | 30 ( 11.54)  | 23 ( 20.72)    | 7 ( 4.70)     | <0.001 | 0.4       | 1         |
|                                     | B     | 140 ( 53.85) | 58 ( 52.25)    | 82 ( 55.03)   |        |           |           |
|                                     | C     | 14 ( 5.38)   | 9 ( 8.11)      | 5 ( 3.36)     |        |           |           |
|                                     | D     | 76 ( 29.23)  | 21 ( 18.92)    | 55 ( 36.91)   |        |           |           |
| <b>GOLD A vs. B,C,D</b>             | A     | 30 (11.54)   | 23 (20.72)     | 7 (4.70)      | <0.001 | 0.4       | 1         |
|                                     | B-C-D | 230 (88.46)  | 88 (79.28)     | 142 (95.30)   |        |           |           |
| <b>Asthma diagnosis</b>             | No    | 247 ( 95.00) | 109 ( 98.20)   | 138 ( 92.62)  | 0.079  | 0.4       | 1         |
|                                     | Yes   | 13 ( 5.00)   | 2 ( 1.80)      | 11 ( 7.38)    |        |           |           |
| <b>Tuberculosis history</b>         | No    | 249 ( 95.77) | 106 ( 95.50)   | 143 ( 95.97)  | 1.000  | 0.4       | 1         |
|                                     | Yes   | 11 ( 4.23)   | 5 ( 4.50)      | 6 ( 4.03)     |        |           |           |
| <b>Chronic bronchitis diagnosis</b> | No    | 258 ( 99.23) | 110 ( 99.10)   | 148 ( 99.33)  | 1.000  | 0.4       | 1         |
|                                     | Yes   | 2 ( 0.77)    | 1 ( 0.90)      | 1 ( 0.67)     |        |           |           |
| <b>Emphysema diagnosis</b>          | No    | 259 ( 99.62) | 111 (100.00)   | 148 ( 99.33)  | 1.000  | 0.4       | 1         |

| Variable                     | level | Overall      | False Negative | True Positive | p  | Missing % | Missing N |
|------------------------------|-------|--------------|----------------|---------------|----|-----------|-----------|
|                              | Yes   | 1 ( 0.38)    | 0 ( 0.00)      | 1 ( 0.67)     |    |           |           |
| <b>Lung cancer diagnosis</b> | No    | 260 (100.00) | 111 (100.00)   | 149 (100.00)  | NA | 0.4       | 1         |

**eTable 10b.** False Negatives vs. True Positives for LFQ in Nepal

| Variable                      | level  | Overall       | False Negative | True Positive | p      | Missing % | Missing N |
|-------------------------------|--------|---------------|----------------|---------------|--------|-----------|-----------|
| <b>n</b>                      |        | 642           | 257            | 385           |        |           |           |
| <b>Age</b>                    |        | 63.31 (11.17) | 57.06 (10.89)  | 67.48 (9.25)  | <0.001 | 0.0       | 0         |
| <b>Sex</b>                    | Male   | 393 ( 61.21)  | 120 ( 46.69)   | 273 ( 70.91)  | <0.001 | 0.0       | 0         |
|                               | Female | 249 ( 38.79)  | 137 ( 53.31)   | 112 ( 29.09)  |        |           |           |
| <b>Ever Smoked</b>            | No     | 287 ( 44.70)  | 177 ( 68.87)   | 110 ( 28.57)  | <0.001 | 0.0       | 0         |
|                               | Yes    | 355 ( 55.30)  | 80 ( 31.13)    | 275 ( 71.43)  |        |           |           |
| <b>Current smoker</b>         | No     | 421 ( 65.58)  | 208 ( 80.93)   | 213 ( 55.32)  | <0.001 | 0.0       | 0         |
|                               | Yes    | 221 ( 34.42)  | 49 ( 19.07)    | 172 ( 44.68)  |        |           |           |
| <b>Ever used biomass</b>      | Yes    | 642 (100.00)  | 257 (100.00)   | 385 (100.00)  | NA     | 0.0       | 0         |
| <b>Currently uses biomass</b> | No     | 595 ( 92.68)  | 246 ( 95.72)   | 349 ( 90.65)  | 0.024  | 0.0       | 0         |
|                               | Yes    | 47 ( 7.32)    | 11 ( 4.28)     | 36 ( 9.35)    |        |           |           |
| <b>Severity - GOLD (1-4)</b>  | 1      | 218 ( 33.96)  | 121 ( 47.08)   | 97 ( 25.19)   | <0.001 | 0.0       | 0         |
|                               | 2      | 310 ( 48.29)  | 112 ( 43.58)   | 198 ( 51.43)  |        |           |           |
|                               | 3      | 97 ( 15.11)   | 24 ( 9.34)     | 73 ( 18.96)   |        |           |           |
|                               | 4      | 17 ( 2.65)    | 0 ( 0.00)      | 17 ( 4.42)    |        |           |           |



| Variable                            | level | Overall      | False Negative | True Positive | p      | Missing % | Missing N |
|-------------------------------------|-------|--------------|----------------|---------------|--------|-----------|-----------|
| <b>GOLD 1,2 vs 3,4</b>              | 1-2   | 528 (82.24)  | 233 (90.66)    | 295 (76.62)   | <0.001 | 00        | 0         |
|                                     | 3-4   | 114 (17.76)  | 24 (9.34)      | 90 (23.38)    |        |           |           |
| <b>Severity - GOLD (A-D)</b>        | A     | 453 ( 70.56) | 220 ( 85.60)   | 233 ( 60.52)  | <0.001 | 0.0       | 0         |
|                                     | B     | 175 ( 27.26) | 36 ( 14.01)    | 139 ( 36.10)  |        |           |           |
|                                     | C     | 2 ( 0.31)    | 0 ( 0.00)      | 2 ( 0.52)     |        |           |           |
|                                     | D     | 12 ( 1.87)   | 1 ( 0.39)      | 11 ( 2.86)    |        |           |           |
| <b>GOLD A VS. B,C,D</b>             | A     | 453 (70.56)  | 220 (85.60)    | 233 (60.52)   | <0.001 | 0/        | 0         |
|                                     | B-C-D | 189 (29.44)  | 37 (14.40)     | 152 (39.48)   |        |           |           |
| <b>Asthma diagnosis</b>             | No    | 542 ( 84.42) | 238 ( 92.61)   | 304 ( 78.96)  | <0.001 | 0.0       | 0         |
|                                     | Yes   | 100 ( 15.58) | 19 ( 7.39)     | 81 ( 21.04)   |        |           |           |
| <b>Tuberculosis history</b>         | No    | 601 ( 93.61) | 243 ( 94.55)   | 358 ( 92.99)  | 0.529  | 0.0       | 0         |
|                                     | Yes   | 41 ( 6.39)   | 14 ( 5.45)     | 27 ( 7.01)    |        |           |           |
| <b>Chronic bronchitis diagnosis</b> | No    | 637 ( 99.22) | 254 ( 98.83)   | 383 ( 99.48)  | 0.648  | 0.0       | 0         |
|                                     | Yes   | 5 ( 0.78)    | 3 ( 1.17)      | 2 ( 0.52)     |        |           |           |
| <b>Emphysema diagnosis</b>          | No    | 641 ( 99.84) | 257 (100.00)   | 384 ( 99.74)  | 1.000  | 0.0       | 0         |
|                                     | Yes   | 1 ( 0.16)    | 0 ( 0.00)      | 1 ( 0.26)     |        |           |           |

| <b>Variable</b>              | <b>level</b> | <b>Overall</b> | <b>False Negative</b> | <b>True Positive</b> | <b>p</b> | <b>Missing %</b> | <b>Missing N</b> |
|------------------------------|--------------|----------------|-----------------------|----------------------|----------|------------------|------------------|
| <b>Lung cancer diagnosis</b> | No           | 642 (100.00)   | 257 (100.00)          | 385 (100.00)         | NA       | 0.0              | 0                |

| Variable                      | level  | Overall       | False Negative | True Positive | p      | Missing % | Missing N |
|-------------------------------|--------|---------------|----------------|---------------|--------|-----------|-----------|
| <b>n</b>                      |        | 97            | 34             | 63            |        |           |           |
| <b>Age</b>                    |        | 60.26 (12.15) | 53.62 (10.02)  | 63.84 (11.75) | <0.001 | 0.0       | 0         |
| <b>Sex</b>                    | Male   | 61 ( 62.89)   | 16 ( 47.06)    | 45 ( 71.43)   | 0.032  | 0.0       | 0         |
|                               | Female | 36 ( 37.11)   | 18 ( 52.94)    | 18 ( 28.57)   |        |           |           |
| <b>Ever Smoked</b>            | No     | 42 ( 43.30)   | 21 ( 61.76)    | 21 ( 33.33)   | 0.013  | 0.0       | 0         |
|                               | Yes    | 55 ( 56.70)   | 13 ( 38.24)    | 42 ( 66.67)   |        |           |           |
| <b>Current smoker</b>         | No     | 76 ( 78.35)   | 31 ( 91.18)    | 45 ( 71.43)   | 0.046  | 0.0       | 0         |
|                               | Yes    | 21 ( 21.65)   | 3 ( 8.82)      | 18 ( 28.57)   |        |           |           |
| <b>Ever used biomass</b>      | Yes    | 97 (100.00)   | 34 (100.00)    | 63 (100.00)   | NA     | 0.0       | 0         |
| <b>Currently uses biomass</b> | No     | 97 (100.00)   | 34 (100.00)    | 63 (100.00)   | NA     | 0.0       | 0         |
| <b>Severity - GOLD (1-4)</b>  | 1      | 50 ( 51.55)   | 21 ( 61.76)    | 29 ( 46.03)   | 0.115  | 0.0       | 0         |
|                               | 2      | 33 ( 34.02)   | 12 ( 35.29)    | 21 ( 33.33)   |        |           |           |
|                               | 3      | 12 ( 12.37)   | 1 ( 2.94)      | 11 ( 17.46)   |        |           |           |
|                               | 4      | 2 ( 2.06)     | 0 ( 0.00)      | 2 ( 3.17)     |        |           |           |
| <b>GOLD 1,2 vs. 3,4</b>       | 1-2    | 83 (85.57)    | 33 (97.06)     | 50 (79.37)    | 0.039  | 0.0       |           |

| Variable                            | level | Overall     | False Negative | True Positive | p      | Missing % | Missing N |
|-------------------------------------|-------|-------------|----------------|---------------|--------|-----------|-----------|
|                                     | 3-4   | 14 (14.43)  | 1 (2.94)       | 13 (20.63)    |        |           |           |
| <b>Severity - GOLD (A-D)</b>        | A     | 23 (23.71)  | 18 (52.94)     | 5 (7.94)      | <0.001 | 0.0       | 0         |
|                                     | B     | 62 (63.92)  | 13 (38.24)     | 49 (77.78)    |        |           |           |
|                                     | D     | 12 (12.37)  | 3 (8.82)       | 9 (14.29)     |        |           |           |
| <b>GOLD A vs. B,C,D</b>             | A     | 23 (23.71)  | 18 (52.94)     | 5 (7.94)      | <0.001 | 0         | 0         |
|                                     | B-C-D | 74 (76.29)  | 16 (47.06)     | 58 (92.06)    |        |           |           |
| <b>Asthma diagnosis</b>             | No    | 63 (64.95)  | 24 (70.59)     | 39 (61.90)    | 0.527  | 0.0       | 0         |
|                                     | Yes   | 34 (35.05)  | 10 (29.41)     | 24 (38.10)    |        |           |           |
| <b>Tuberculosis history</b>         | No    | 65 (67.01)  | 23 (67.65)     | 42 (66.67)    | 1.000  | 0.0       | 0         |
|                                     | Yes   | 32 (32.99)  | 11 (32.35)     | 21 (33.33)    |        |           |           |
| <b>Chronic bronchitis diagnosis</b> | No    | 82 (84.54)  | 32 (94.12)     | 50 (79.37)    | 0.105  | 0.0       | 0         |
|                                     | Yes   | 15 (15.46)  | 2 (5.88)       | 13 (20.63)    |        |           |           |
| <b>Emphysema diagnosis</b>          | No    | 96 (98.97)  | 34 (100.00)    | 62 (98.41)    | 1.000  | 0.0       | 0         |
|                                     | Yes   | 1 (1.03)    | 0 (0.00)       | 1 (1.59)      |        |           |           |
| <b>Lung cancer diagnosis</b>        | No    | 97 (100.00) | 34 (100.00)    | 63 (100.00)   | NA     | 0.0       | 0         |

**Characteristics of False Positives vs. True Negatives for COLA (Cutpoint = 4)**

**eTable 11a.** False Positives vs. True Negatives for COLA in Uganda

| Variable                      | level  | Overall       | False Positive | True Negative | p      | Missing % | Missing N |
|-------------------------------|--------|---------------|----------------|---------------|--------|-----------|-----------|
| <b>n</b>                      |        | 3319          | 846            | 2444          |        |           |           |
| <b>Age</b>                    |        | 55.69 (11.98) | 65.76 (10.36)  | 52.18 (10.42) | <0.001 | 0.0       | 0         |
| <b>Sex</b>                    | Male   | 1620 ( 48.81) | 255 ( 30.14)   | 1351 ( 55.28) | <0.001 | 0.0       | 0         |
|                               | Female | 1699 ( 51.19) | 591 ( 69.86)   | 1093 ( 44.72) |        |           |           |
| <b>Ever Smoked</b>            | No     | 2817 ( 84.93) | 637 ( 75.30)   | 2159 ( 88.34) | <0.001 | 0.1       | 2         |
|                               | Yes    | 500 ( 15.07)  | 209 ( 24.70)   | 285 ( 11.66)  |        |           |           |
| <b>Current smoker</b>         | No     | 3024 ( 91.17) | 689 ( 81.44)   | 2312 ( 94.60) | <0.001 | 0.1       | 2         |
|                               | Yes    | 293 ( 8.83)   | 157 ( 18.56)   | 132 ( 5.40)   |        |           |           |
| <b>Ever used biomass</b>      | Yes    | 3319 (100.00) | 846 (100.00)   | 2444 (100.00) | NA     | 0.0       | 0         |
| <b>Currently uses biomass</b> | No     | 580 ( 17.56)  | 30 ( 3.55)     | 549 ( 22.46)  | <0.001 | 0.5       | 16        |
|                               | Yes    | 2723 ( 82.44) | 816 ( 96.45)   | 1895 ( 77.54) |        |           |           |
| <b>Asthma diagnosis</b>       | No     | 3304 ( 99.58) | 841 ( 99.41)   | 2436 ( 99.67) | 0.462  | 0.0       | 1         |
|                               | Yes    | 14 ( 0.42)    | 5 ( 0.59)      | 8 ( 0.33)     |        |           |           |
| <b>Tuberculosis history</b>   | No     | 3291 ( 99.19) | 839 ( 99.17)   | 2425 ( 99.22) | 1.000  | 0.0       | 1         |

| Variable                            | level | Overall       | False Positive | True Negative | p     | Missing % | Missing N |
|-------------------------------------|-------|---------------|----------------|---------------|-------|-----------|-----------|
|                                     | Yes   | 27 ( 0.81)    | 7 ( 0.83)      | 19 ( 0.78)    |       |           |           |
| <b>Chronic bronchitis diagnosis</b> | No    | 3314 ( 99.88) | 843 ( 99.65)   | 2443 ( 99.96) | 0.092 | 0.0       | 1         |
|                                     | Yes   | 4 ( 0.12)     | 3 ( 0.35)      | 1 ( 0.04)     |       |           |           |
| <b>Emphysema diagnosis</b>          | No    | 3318 (100.00) | 846 (100.00)   | 2444 (100.00) | NA    | 0.0       | 1         |
| <b>Lung cancer diagnosis</b>        | No    | 3318 (100.00) | 846 (100.00)   | 2444 (100.00) | NA    | 0.0       | 1         |

**eTable 11b.** False Positives vs. True Negatives for COLA in Nepal

| Variable                      | level  | Overall       | False Positive | True Negative | p      | Missing % | Missing N |
|-------------------------------|--------|---------------|----------------|---------------|--------|-----------|-----------|
| <b>n</b>                      |        | 2892          | 181            | 2711          |        |           |           |
| <b>Age</b>                    |        | 54.62 (11.21) | 67.02 (8.28)   | 53.79 (10.88) | <0.001 | 0.0       | 0         |
| <b>Sex</b>                    | Male   | 1372 ( 47.44) | 65 ( 35.91)    | 1307 ( 48.21) | 0.002  | 0.0       | 0         |
|                               | Female | 1520 ( 52.56) | 116 ( 64.09)   | 1404 ( 51.79) |        |           |           |
| <b>Ever Smoked</b>            | No     | 2099 ( 72.58) | 85 ( 46.96)    | 2014 ( 74.29) | <0.001 | 0.0       | 0         |
|                               | Yes    | 793 ( 27.42)  | 96 ( 53.04)    | 697 ( 25.71)  |        |           |           |
| <b>Current smoker</b>         | No     | 2386 ( 82.50) | 95 ( 52.49)    | 2291 ( 84.51) | <0.001 | 0.0       | 0         |
|                               | Yes    | 506 ( 17.50)  | 86 ( 47.51)    | 420 ( 15.49)  |        |           |           |
| <b>Ever used biomass</b>      | No     | 2 ( 0.07)     | 0 ( 0.00)      | 2 ( 0.07)     | 1.000  | 0.0       | 0         |
|                               | Yes    | 2890 ( 99.93) | 181 (100.00)   | 2709 ( 99.93) |        |           |           |
| <b>Currently uses biomass</b> | No     | 2752 ( 95.16) | 136 ( 75.14)   | 2616 ( 96.50) | <0.001 | 0.0       | 0         |
|                               | Yes    | 140 ( 4.84)   | 45 ( 24.86)    | 95 ( 3.50)    |        |           |           |
| <b>Asthma diagnosis</b>       | No     | 2861 ( 98.93) | 166 ( 91.71)   | 2695 ( 99.41) | <0.001 | 0.0       | 0         |
|                               | Yes    | 31 ( 1.07)    | 15 ( 8.29)     | 16 ( 0.59)    |        |           |           |
| <b>Tuberculosis history</b>   | No     | 2820 ( 97.51) | 176 ( 97.24)   | 2644 ( 97.53) | 1.000  | 0.0       | 0         |

| Variable                            | level | Overall       | False Positive | True Negative | p     | Missing % | Missing N |
|-------------------------------------|-------|---------------|----------------|---------------|-------|-----------|-----------|
|                                     | Yes   | 72 ( 2.49)    | 5 ( 2.76)      | 67 ( 2.47)    |       |           |           |
| <b>Chronic bronchitis diagnosis</b> | No    | 2890 ( 99.93) | 180 ( 99.45)   | 2710 ( 99.96) | 0.274 | 0.0       | 0         |
|                                     | Yes   | 2 ( 0.07)     | 1 ( 0.55)      | 1 ( 0.04)     |       |           |           |
| <b>Emphysema diagnosis</b>          | No    | 2891 ( 99.97) | 181 (100.00)   | 2710 ( 99.96) | 1.000 | 0.0       | 0         |
|                                     | Yes   | 1 ( 0.03)     | 0 ( 0.00)      | 1 ( 0.04)     |       |           |           |
| <b>Lung cancer diagnosis</b>        | No    | 2892 (100.00) | 181 (100.00)   | 2711 (100.00) | NA    | 0.0       | 0         |



**eTable 11c.** False Positives vs. True Negatives for COLA in Peru

| Variable                      | level  | Overall       | False Positive | True Negative | p      | Missing % | Missing N |
|-------------------------------|--------|---------------|----------------|---------------|--------|-----------|-----------|
| <b>n</b>                      |        | 3453          | 276            | 3171          |        |           |           |
| <b>Age</b>                    |        | 56.53 (11.28) | 65.02 (9.54)   | 55.79 (11.12) | <0.001 | 0.0       | 0         |
| <b>Sex</b>                    | Male   | 1722 (49.87)  | 84 (30.43)     | 1635 (51.56)  | <0.001 | 0.0       | 0         |
|                               | Female | 1731 (50.13)  | 192 (69.57)    | 1536 (48.44)  |        |           |           |
| <b>Ever Smoked</b>            | No     | 1533 (44.40)  | 136 (49.28)    | 1393 (43.93)  | 0.099  | 0.0       | 0         |
|                               | Yes    | 1920 (55.60)  | 140 (50.72)    | 1778 (56.07)  |        |           |           |
| <b>Current smoker</b>         | No     | 2914 (84.41)  | 211 (76.45)    | 2698 (85.08)  | <0.001 | 0.0       | 1         |
|                               | Yes    | 538 (15.59)   | 65 (23.55)     | 473 (14.92)   |        |           |           |
| <b>Ever used biomass</b>      | Yes    | 3453 (100.00) | 276 (100.00)   | 3171 (100.00) | NA     | 0.0       | 0         |
| <b>Currently uses biomass</b> | No     | 3435 (99.54)  | 267 (96.74)    | 3164 (99.78)  | <0.001 | 0.1       | 2         |
|                               | Yes    | 16 (0.46)     | 9 (3.26)       | 7 (0.22)      |        |           |           |
| <b>Asthma diagnosis</b>       | No     | 3231 (93.60)  | 225 (81.52)    | 3001 (94.67)  | <0.001 | 0.0       | 1         |
|                               | Yes    | 221 (6.40)    | 51 (18.48)     | 169 (5.33)    |        |           |           |
| <b>Tuberculosis history</b>   | No     | 3204 (92.84)  | 252 (91.64)    | 2946 (92.93)  | 0.498  | 0.1       | 2         |
|                               | Yes    | 247 (7.16)    | 23 (8.36)      | 224 (7.07)    |        |           |           |

| Variable                            | level | Overall       | False Positive | True Negative | p     | Missing % | Missing N |
|-------------------------------------|-------|---------------|----------------|---------------|-------|-----------|-----------|
| <b>Chronic bronchitis diagnosis</b> | No    | 3363 ( 97.45) | 260 ( 94.20)   | 3098 ( 97.76) | 0.001 | 0.1       | 2         |
|                                     | Yes   | 88 ( 2.55)    | 16 ( 5.80)     | 71 ( 2.24)    |       |           |           |
| <b>Emphysema diagnosis</b>          | No    | 3450 ( 99.97) | 276 (100.00)   | 3168 ( 99.97) | 1.000 | 0.1       | 2         |
|                                     | Yes   | 1 ( 0.03)     | 0 ( 0.00)      | 1 ( 0.03)     |       |           |           |
| <b>Lung cancer diagnosis</b>        | No    | 3452 (100.00) | 276 (100.00)   | 3170 (100.00) | NA    | 0.0       | 1         |

**Characteristics of False Negatives vs. True Positives for COLA (Cutpoint = 4)**

**eTable 12a.** False Negatives vs. True Positives for COLA in Uganda

| Variable                      | level  | Overall       | False Negative | True Positive | p      | Missing % | Missing N |
|-------------------------------|--------|---------------|----------------|---------------|--------|-----------|-----------|
| <b>n</b>                      |        | 261           | 91             | 169           |        |           |           |
| <b>Age</b>                    |        | 61.08 (12.98) | 52.48 (10.41)  | 65.84 (11.72) | <0.001 | 0.0       | 0         |
| <b>Sex</b>                    | Male   | 137 ( 52.49)  | 52 ( 57.14)    | 84 ( 49.70)   | 0.310  | 0.0       | 0         |
|                               | Female | 124 ( 47.51)  | 39 ( 42.86)    | 85 ( 50.30)   |        |           |           |
| <b>Ever Smoked</b>            | No     | 167 ( 64.23)  | 69 ( 75.82)    | 98 ( 57.99)   | 0.006  | 0.4       | 1         |
|                               | Yes    | 93 ( 35.77)   | 22 ( 24.18)    | 71 ( 42.01)   |        |           |           |
| <b>Current smoker</b>         | No     | 198 ( 76.15)  | 80 ( 87.91)    | 118 ( 69.82)  | 0.002  | 0.4       | 1         |
|                               | Yes    | 62 ( 23.85)   | 11 ( 12.09)    | 51 ( 30.18)   |        |           |           |
| <b>Ever used biomass</b>      | Yes    | 261 (100.00)  | 91 (100.00)    | 169 (100.00)  | NA     | 0.0       | 0         |
| <b>Currently uses biomass</b> | No     | 52 ( 19.92)   | 31 ( 34.07)    | 20 ( 11.83)   | <0.001 | 0.0       | 0         |
|                               | Yes    | 209 ( 80.08)  | 60 ( 65.93)    | 149 ( 88.17)  |        |           |           |
| <b>Severity - GOLD (1-4)</b>  | 1      | 77 ( 29.50)   | 30 ( 32.97)    | 46 ( 27.22)   | 0.121  | 0.0       | 0         |
|                               | 2      | 149 ( 57.09)  | 55 ( 60.44)    | 94 ( 55.62)   |        |           |           |
|                               | 3      | 29 ( 11.11)   | 5 ( 5.49)      | 24 ( 14.20)   |        |           |           |

| Variable                            | level | Overall      | False Negative | True Positive | p      | Missing % | Missing N |
|-------------------------------------|-------|--------------|----------------|---------------|--------|-----------|-----------|
|                                     | 4     | 6 ( 2.30)    | 1 ( 1.10)      | 5 ( 2.96)     |        |           |           |
| <b>GOLD 1,2 vs. 3,4</b>             | 1-2   | 226 ( 86.59) | 85 ( 93.41)    | 140 ( 82.84)  | 0.028  | 0.0       | 0         |
|                                     | 3-4   | 35 ( 13.41)  | 6 ( 6.59)      | 29 ( 17.16)   |        |           |           |
| <b>Severity - GOLD (A-D)</b>        | A     | 30 ( 11.54)  | 22 ( 24.18)    | 8 ( 4.73)     | <0.001 | 0.4       | 1         |
|                                     | B     | 140 ( 53.85) | 42 ( 46.15)    | 98 ( 57.99)   |        |           |           |
|                                     | C     | 14 ( 5.38)   | 8 ( 8.79)      | 6 ( 3.55)     |        |           |           |
|                                     | D     | 76 ( 29.23)  | 19 ( 20.88)    | 57 ( 33.73)   |        |           |           |
| <b>Gold A,B,C vs. D</b>             | A     | 30 ( 11.54)  | 22 ( 24.18)    | 8 ( 4.73)     | <0.001 | 0.4       | 1         |
|                                     | B-C-D | 230 ( 88.46) | 69 ( 75.82)    | 161 ( 95.27)  |        |           |           |
| <b>Asthma diagnosis</b>             | No    | 247 ( 95.00) | 90 ( 98.90)    | 157 ( 92.90)  | 0.069  | 0.4       | 1         |
|                                     | Yes   | 13 ( 5.00)   | 1 ( 1.10)      | 12 ( 7.10)    |        |           |           |
| <b>Tuberculosis history</b>         | No    | 249 ( 95.77) | 89 ( 97.80)    | 160 ( 94.67)  | 0.383  | 0.4       | 1         |
|                                     | Yes   | 11 ( 4.23)   | 2 ( 2.20)      | 9 ( 5.33)     |        |           |           |
| <b>Chronic bronchitis diagnosis</b> | No    | 258 ( 99.23) | 91 (100.00)    | 167 ( 98.82)  | 0.766  | 0.4       | 1         |
|                                     | Yes   | 2 ( 0.77)    | 0 ( 0.00)      | 2 ( 1.18)     |        |           |           |
| <b>Emphysema diagnosis</b>          | No    | 259 ( 99.62) | 91 (100.00)    | 168 ( 99.41)  | 1.000  | 0.4       | 1         |

| Variable                     | level | Overall      | False Negative | True Positive | p  | Missing % | Missing N |
|------------------------------|-------|--------------|----------------|---------------|----|-----------|-----------|
|                              | Yes   | 1 (0.38)     | 0 (0.00)       | 1 (0.59)      |    |           |           |
| <b>Lung cancer diagnosis</b> | No    | 260 (100.00) | 91 (100.00)    | 169 (100.00)  | NA | 0.4       | 1         |

**eTable 12b.** False Negatives vs. True Positives for COLA in Nepal

| Variable                      | level  | Overall       | False Negative | True Positive | p      | Missing % | Missing N |
|-------------------------------|--------|---------------|----------------|---------------|--------|-----------|-----------|
| <b>n</b>                      |        | 642           | 390            | 252           |        |           |           |
| <b>Age</b>                    |        | 63.31 (11.17) | 59.92 (11.24)  | 68.55 (8.78)  | <0.001 | 0.0       | 0         |
| <b>Sex</b>                    | Male   | 393 ( 61.21)  | 239 ( 61.28)   | 154 ( 61.11)  | 1.000  | 0.0       | 0         |
|                               | Female | 249 ( 38.79)  | 151 ( 38.72)   | 98 ( 38.89)   |        |           |           |
| <b>Ever Smoked</b>            | No     | 287 ( 44.70)  | 197 ( 50.51)   | 90 ( 35.71)   | <0.001 | 0.0       | 0         |
|                               | Yes    | 355 ( 55.30)  | 193 ( 49.49)   | 162 ( 64.29)  |        |           |           |
| <b>Current smoker</b>         | No     | 421 ( 65.58)  | 285 ( 73.08)   | 136 ( 53.97)  | <0.001 | 0.0       | 0         |
|                               | Yes    | 221 ( 34.42)  | 105 ( 26.92)   | 116 ( 46.03)  |        |           |           |
| <b>Ever used biomass</b>      | Yes    | 642 (100.00)  | 390 (100.00)   | 252 (100.00)  | NA     | 0.0       | 0         |
| <b>Currently uses biomass</b> | No     | 595 ( 92.68)  | 380 ( 97.44)   | 215 ( 85.32)  | <0.001 | 0.0       | 0         |
|                               | Yes    | 47 ( 7.32)    | 10 ( 2.56)     | 37 ( 14.68)   |        |           |           |
| <b>Severity - GOLD (1-4)</b>  | 1      | 218 ( 33.96)  | 176 ( 45.13)   | 42 ( 16.67)   | <0.001 | 0.0       | 0         |
|                               | 2      | 310 ( 48.29)  | 175 ( 44.87)   | 135 ( 53.57)  |        |           |           |
|                               | 3      | 97 ( 15.11)   | 32 ( 8.21)     | 65 ( 25.79)   |        |           |           |
|                               | 4      | 17 ( 2.65)    | 7 ( 1.79)      | 10 ( 3.97)    |        |           |           |

| Variable                            | level | Overall      | False Negative | True Positive | p      | Missing % | Missing N |
|-------------------------------------|-------|--------------|----------------|---------------|--------|-----------|-----------|
| <b>GOLD 1,2 vs. 3,4</b>             | 1-2   | 528 ( 82.24) | 351 ( 90.00)   | 177 ( 70.24)  | <0.001 | 0.0       | 0         |
|                                     | 3-4   | 114 ( 17.76) | 39 ( 10.00)    | 75 ( 29.76)   |        |           |           |
| <b>Severity - GOLD (A-D)</b>        | A     | 453 ( 70.56) | 325 ( 83.33)   | 128 ( 50.79)  | <0.001 | 0.0       | 0         |
|                                     | B     | 175 ( 27.26) | 62 ( 15.90)    | 113 ( 44.84)  |        |           |           |
|                                     | C     | 2 ( 0.31)    | 1 ( 0.26)      | 1 ( 0.40)     |        |           |           |
|                                     | D     | 12 ( 1.87)   | 2 ( 0.51)      | 10 ( 3.97)    |        |           |           |
| <b>Gold A,B,C vs. D</b>             | A     | 453 ( 70.56) | 325 ( 83.33)   | 128 ( 50.79)  | <0.001 | 0.0       | 0         |
|                                     | B-C-D | 189 ( 29.44) | 65 ( 16.67)    | 124 ( 49.21)  |        |           |           |
| <b>Asthma diagnosis</b>             | No    | 542 ( 84.42) | 359 ( 92.05)   | 183 ( 72.62)  | <0.001 | 0.0       | 0         |
|                                     | Yes   | 100 ( 15.58) | 31 ( 7.95)     | 69 ( 27.38)   |        |           |           |
| <b>Tuberculosis history</b>         | No    | 601 ( 93.61) | 368 ( 94.36)   | 233 ( 92.46)  | 0.426  | 0.0       | 0         |
|                                     | Yes   | 41 ( 6.39)   | 22 ( 5.64)     | 19 ( 7.54)    |        |           |           |
| <b>Chronic bronchitis diagnosis</b> | No    | 637 ( 99.22) | 387 ( 99.23)   | 250 ( 99.21)  | 1.000  | 0.0       | 0         |
|                                     | Yes   | 5 ( 0.78)    | 3 ( 0.77)      | 2 ( 0.79)     |        |           |           |
| <b>Emphysema diagnosis</b>          | No    | 641 ( 99.84) | 389 ( 99.74)   | 252 (100.00)  | 1.000  | 0.0       | 0         |
|                                     | Yes   | 1 ( 0.16)    | 1 ( 0.26)      | 0 ( 0.00)     |        |           |           |

| <b>Variable</b>              | <b>level</b> | <b>Overall</b> | <b>False Negative</b> | <b>True Positive</b> | <b>p</b> | <b>Missing %</b> | <b>Missing N</b> |
|------------------------------|--------------|----------------|-----------------------|----------------------|----------|------------------|------------------|
| <b>Lung cancer diagnosis</b> | No           | 642 (100.00)   | 390 (100.00)          | 252 (100.00)         | NA       | 0.0              | 0                |



**eTable 12c.** False Negatives vs. True Positives for COLA in Peru

| Variable                      | level  | Overall       | False Negative | True Positive | p      | Missing % | Missing N |
|-------------------------------|--------|---------------|----------------|---------------|--------|-----------|-----------|
| <b>n</b>                      |        | 97            | 62             | 35            |        |           |           |
| <b>Age</b>                    |        | 60.26 (12.15) | 56.92 (12.10)  | 66.17 (9.91)  | <0.001 | 0.0       | 0         |
| <b>Sex</b>                    | Male   | 61 ( 62.89)   | 39 ( 62.90)    | 22 ( 62.86)   | 1.000  | 0.0       | 0         |
|                               | Female | 36 ( 37.11)   | 23 ( 37.10)    | 13 ( 37.14)   |        |           |           |
| <b>Ever Smoked</b>            | No     | 42 ( 43.30)   | 26 ( 41.94)    | 16 ( 45.71)   | 0.883  | 0.0       | 0         |
|                               | Yes    | 55 ( 56.70)   | 36 ( 58.06)    | 19 ( 54.29)   |        |           |           |
| <b>Current smoker</b>         | No     | 76 ( 78.35)   | 46 ( 74.19)    | 30 ( 85.71)   | 0.286  | 0.0       | 0         |
|                               | Yes    | 21 ( 21.65)   | 16 ( 25.81)    | 5 ( 14.29)    |        |           |           |
| <b>Ever used biomass</b>      | Yes    | 97 (100.00)   | 62 (100.00)    | 35 (100.00)   | NA     | 0.0       | 0         |
| <b>Currently uses biomass</b> | No     | 97 (100.00)   | 62 (100.00)    | 35 (100.00)   | NA     | 0.0       | 0         |
| <b>Severity - GOLD (1-4)</b>  | 1      | 50 ( 51.55)   | 41 ( 66.13)    | 9 ( 25.71)    | 0.001  | 0.0       | 0         |
|                               | 2      | 33 ( 34.02)   | 17 ( 27.42)    | 16 ( 45.71)   |        |           |           |

| Variable                     | level | Overall     | False Negative | True Positive | p      | Missing % | Missing N |
|------------------------------|-------|-------------|----------------|---------------|--------|-----------|-----------|
|                              | 3     | 12 ( 12.37) | 4 ( 6.45)      | 8 ( 22.86)    |        |           |           |
|                              | 4     | 2 ( 2.06)   | 0 ( 0.00)      | 2 ( 5.71)     |        |           |           |
| <b>GOLD 1,2 vs. 3,4</b>      | 1-2   | 83 ( 85.57) | 58 ( 93.55)    | 25 ( 71.43)   | 0.007  | 0.0       | 0         |
|                              | 3-4   | 14 ( 14.43) | 4 ( 6.45)      | 10 ( 28.57)   |        |           |           |
| <b>Severity - GOLD (A-D)</b> | A     | 23 ( 23.71) | 22 ( 35.48)    | 1 ( 2.86)     | <0.001 | 0.0       | 0         |
|                              | B     | 62 ( 63.92) | 36 ( 58.06)    | 26 ( 74.29)   |        |           |           |
|                              | D     | 12 ( 12.37) | 4 ( 6.45)      | 8 ( 22.86)    |        |           |           |
| <b>Gold A,B,C vs. D</b>      | A     | 23 ( 23.71) | 22 ( 35.48)    | 1 ( 2.86)     | 0.001  | 0.0       | 0         |
|                              | B-C-D | 74 ( 76.29) | 40 ( 64.52)    | 34 ( 97.14)   |        |           |           |
| <b>Asthma diagnosis</b>      | No    | 63 ( 64.95) | 48 ( 77.42)    | 15 ( 42.86)   | 0.001  | 0.0       | 0         |
|                              | Yes   | 34 ( 35.05) | 14 ( 22.58)    | 20 ( 57.14)   |        |           |           |
| <b>Tuberculosis history</b>  | No    | 65 ( 67.01) | 40 ( 64.52)    | 25 ( 71.43)   | 0.638  | 0.0       | 0         |

| Variable                            | level | Overall     | False Negative | True Positive | p     | Missing % | Missing N |
|-------------------------------------|-------|-------------|----------------|---------------|-------|-----------|-----------|
|                                     | Yes   | 32 ( 32.99) | 22 ( 35.48)    | 10 ( 28.57)   |       |           |           |
| <b>Chronic bronchitis diagnosis</b> | No    | 82 ( 84.54) | 57 ( 91.94)    | 25 ( 71.43)   | 0.017 | 0.0       | 0         |
|                                     | Yes   | 15 ( 15.46) | 5 ( 8.06)      | 10 ( 28.57)   |       |           |           |
| <b>Emphysema diagnosis</b>          | No    | 96 ( 98.97) | 61 ( 98.39)    | 35 (100.00)   | 1.000 | 0.0       | 0         |
|                                     | Yes   | 1 ( 1.03)   | 1 ( 1.61)      | 0 ( 0.00)     |       |           |           |
| <b>Lung cancer diagnosis</b>        | No    | 97 (100.00) | 62 (100.00)    | 35 (100.00)   | NA    | 0.0       | 0         |

**eFigure 2.** Performance of the 3 COPD Screening Tools at the 3 sites, Weighted to the Population Data. Green = true negative, red = true positive, white= false negative, yellow= false positive.

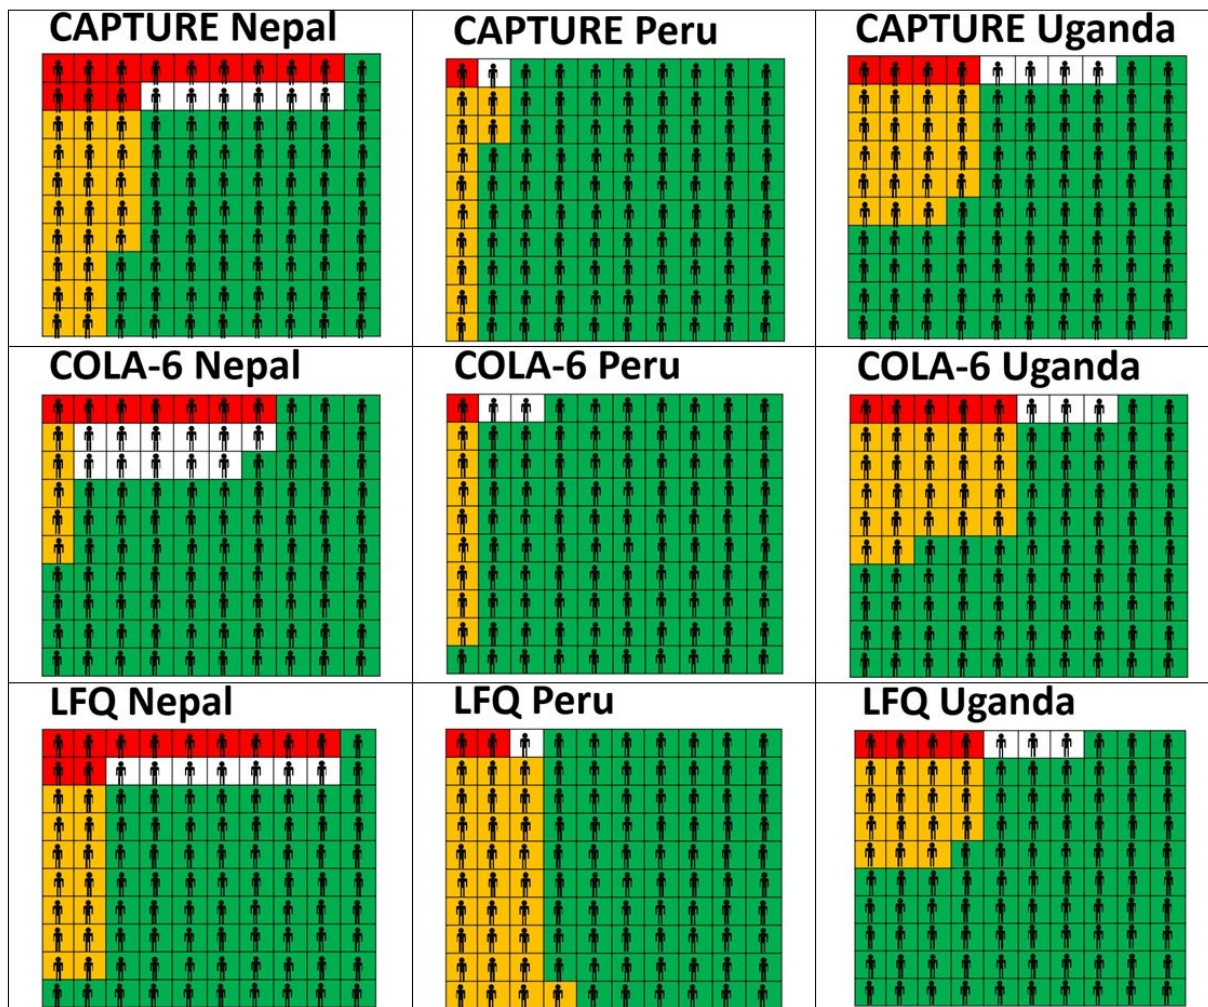

## D. Sensitivity analyses using alternative definitions of COPD

We assessed the sensitivity of the results to different definitions of a positive COPD case. There are three alternative definitions that have been considered, listed below:

- **SA1:** A positive case is anyone with a post-bronchodilator FEV1/FVC ratio that is below 0.7;
- **SA2:** A positive case is anyone with a Post-bronchodilator FEV1/FVC ratio that is below the LLN (as per the primary analysis) *AND* 2017 GOLD classification B, C or D;
- **SA3:** A positive case is anyone with a Post-bronchodilator FEV1/FVC ratio that is below the LLN (as per the primary analysis) *AND* FEV1<60% predicted (Martinez et al 2017);

**eTable 13.** COPD Prevalence Given Alternative Definitions of COPD

| Variable                   | Level | Nepal        | Peru         | Uganda       | Missing % | Missing N |
|----------------------------|-------|--------------|--------------|--------------|-----------|-----------|
| <b>n</b>                   |       | 3534         | 3551         | 3624         |           |           |
| <b>COPD Prevalence</b>     | No    | 2892 (81.83) | 3453 (97.27) | 3319 (92.71) | 0.4       | 45        |
|                            | Yes   | 642 (18.17)  | 97 ( 2.73)   | 261 ( 7.29)  |           |           |
| <b>COPD Prevalence SA1</b> | No    | 2776 (78.55) | 3406 (95.94) | 3231 (90.25) | 0.4       | 45        |
|                            | Yes   | 758 (21.45)  | 144 ( 4.06)  | 349 ( 9.75)  |           |           |
| <b>COPD Prevalence SA2</b> | No    | 3345 (94.65) | 3476 (97.92) | 3349 (93.55) | 0.4       | 45        |
|                            | Yes   | 189 ( 5.35)  | 74 ( 2.08)   | 231 ( 6.45)  |           |           |
| <b>COPD Prevalence SA3</b> | No    | 3328 (94.17) | 3526 (99.32) | 3512 (98.10) | 0.4       | 45        |
|                            | Yes   | 206 ( 5.83)  | 24 ( 0.68)   | 68 ( 1.90)   |           |           |

## Alternative Definition SA1: Fixed FEV<sub>1</sub>/FVC ratio (<0.7)

### *AUCs for continuous predictors*

**eTable 14.** Unweighted and Weighted AUCs (and Their 95% CIs) for Continuous Predictors Given a Definition of COPD as FEV<sub>1</sub>/FVC ratio <0.7.

|                        | Uganda |        |       | Nepal |        |       | Peru  |        |       |
|------------------------|--------|--------|-------|-------|--------|-------|-------|--------|-------|
|                        | AUC    | 95% CI |       | AUC   | 95% CI |       | AUC   | 95% CI |       |
| <b>Unweighted AUCs</b> |        |        |       |       |        |       |       |        |       |
| <b>LFQ</b>             | 0.808  | 0.784  | 0.833 | 0.824 | 0.808  | 0.840 | 0.752 | 0.712  | 0.791 |
| <b>CAPTURE W/O PEF</b> | 0.663  | 0.631  | 0.695 | 0.601 | 0.579  | 0.624 | 0.670 | 0.622  | 0.718 |
| <b>COLA</b>            | 0.774  | 0.748  | 0.801 | 0.813 | 0.796  | 0.829 | 0.787 | 0.752  | 0.823 |
| <b>Weighted AUCs</b>   |        |        |       |       |        |       |       |        |       |
| <b>LFQ</b>             | 0.806  | 0.779  | 0.833 | 0.826 | 0.807  | 0.840 | 0.754 | 0.714  | 0.792 |
| <b>CAPTURE W/O PEF</b> | 0.667  | 0.633  | 0.698 | 0.603 | 0.581  | 0.627 | 0.671 | 0.625  | 0.721 |
| <b>COLA</b>            | 0.780  | 0.748  | 0.803 | 0.812 | 0.790  | 0.825 | 0.790 | 0.756  | 0.826 |

## Diagnostic accuracy for binary predictors

### CAPTURE

**eTable 15.** Unweighted and Weighted Diagnostic Performance Estimators (All With 95% Confidence Intervals) for CAPTURE, for COPD Definition SA1.

|                        | Uganda |        |       | Nepal |        |       | Peru  |        |       |
|------------------------|--------|--------|-------|-------|--------|-------|-------|--------|-------|
|                        | est    | 95% CI |       | est   | 95% CI |       | est   | 95% CI |       |
| <b>Unweighted</b>      |        |        |       |       |        |       |       |        |       |
| <b>Sensitivity (%)</b> | 49.57  | 44.20  | 54.94 | 62.01 | 58.44  | 65.47 | 50.00 | 41.56  | 58.44 |
| <b>Specificity (%)</b> | 79.66  | 78.23  | 81.04 | 75.61 | 73.97  | 77.20 | 89.45 | 88.37  | 90.47 |
| <b>PPV (%)</b>         | 20.89  | 18.17  | 23.82 | 40.98 | 38.11  | 43.89 | 16.71 | 13.31  | 20.57 |
| <b>NPV (%)</b>         | 93.58  | 92.60  | 94.47 | 87.93 | 86.56  | 89.22 | 97.69 | 97.10  | 98.19 |
| <b>Accuracy (%)</b>    | 76.72  | 75.29  | 78.09 | 72.69 | 71.19  | 74.16 | 87.85 | 86.73  | 88.91 |
| <b>Weighted</b>        |        |        |       |       |        |       |       |        |       |
| <b>Sensitivity (%)</b> | 48.64  | 43.18  | 54.12 | 61.91 | 58.33  | 65.40 | 50.73 | 42.17  | 59.26 |
| <b>Specificity (%)</b> | 80.33  | 78.91  | 81.69 | 75.81 | 74.19  | 77.37 | 89.49 | 88.42  | 90.50 |
| <b>PPV (%)</b>         | 18.98  | 16.43  | 21.73 | 40.01 | 37.26  | 42.81 | 15.76 | 12.50  | 19.47 |
| <b>NPV (%)</b>         | 94.29  | 93.41  | 95.08 | 88.42 | 87.16  | 89.61 | 97.91 | 97.38  | 98.36 |
| <b>Accuracy (%)</b>    | 77.59  | 76.19  | 78.93 | 72.94 | 71.46  | 74.38 | 88.05 | 86.95  | 89.08 |

**LFQ (Cutpoint = 18)****eTable 16.** Unweighted and Weighted Diagnostic Performance Estimators (All With 95% Confidence Intervals) for LFQ Considering a Cutpoint of 18, for COPD definition SA1

|                        | Uganda |        |       | Nepal |        |       | Peru  |        |       |
|------------------------|--------|--------|-------|-------|--------|-------|-------|--------|-------|
|                        | est    | 95% CI |       | est   | 95% CI |       | est   | 95% CI |       |
| <b>Unweighted</b>      |        |        |       |       |        |       |       |        |       |
| <b>Sensitivity (%)</b> | 61.60  | 56.28  | 66.73 | 61.35 | 57.77  | 64.83 | 68.53 | 60.24  | 76.03 |
| <b>Specificity (%)</b> | 83.66  | 82.34  | 84.93 | 84.58 | 83.18  | 85.91 | 71.33 | 69.78  | 72.84 |
| <b>PPV (%)</b>         | 29.01  | 25.77  | 32.43 | 52.07 | 48.74  | 55.39 | 9.12  | 7.47   | 11.01 |
| <b>NPV (%)</b>         | 95.26  | 94.41  | 96.02 | 88.91 | 87.65  | 90.08 | 98.18 | 97.57  | 98.67 |
| <b>Accuracy (%)</b>    | 81.51  | 80.19  | 82.77 | 79.60 | 78.23  | 80.92 | 71.22 | 69.69  | 72.70 |
| <b>Weighted</b>        |        |        |       |       |        |       |       |        |       |
| <b>Sensitivity (%)</b> | 59.46  | 53.97  | 64.78 | 60.77 | 57.22  | 64.23 | 67.53 | 59.03  | 75.27 |
| <b>Specificity (%)</b> | 85.11  | 83.93  | 86.23 | 85.19 | 83.91  | 86.41 | 72.36 | 70.90  | 73.78 |
| <b>PPV (%)</b>         | 27.44  | 24.28  | 30.78 | 51.68 | 48.39  | 54.95 | 8.58  | 7.02   | 10.36 |
| <b>NPV (%)</b>         | 95.68  | 94.90  | 96.38 | 89.28 | 88.09  | 90.40 | 98.31 | 97.74  | 98.76 |
| <b>Accuracy (%)</b>    | 82.89  | 81.69  | 84.03 | 80.14 | 78.86  | 81.38 | 72.18 | 70.74  | 73.58 |



**COLA (Cutpoint = 4)**

**eTable 17.** Unweighted and Weighted Diagnostic Performance Estimators (All With 95% Confidence Intervals) for COLA Considering a Cutpoint of 4, for COPD Definition SA1

|                        | Uganda |        |       | Nepal |        |       | Peru  |        |       |       |
|------------------------|--------|--------|-------|-------|--------|-------|-------|--------|-------|-------|
|                        | est    | 95% CI |       | est   | 95% CI |       | est   | 95% CI |       |       |
| <b>Unweighted</b>      |        |        |       |       |        |       |       |        |       |       |
| <b>Sensitivity (%)</b> | 48.89  | 67.53  | 62.33 | 72.42 | 37.73  | 34.27 | 41.29 | 38.19  | 30.23 | 46.65 |
| <b>Specificity (%)</b> | 88.05  | 75.64  | 74.11 | 77.12 | 94.70  | 93.81 | 95.51 | 92.47  | 91.53 | 93.34 |
| <b>PPV (%)</b>         | 34.99  | 23.15  | 20.59 | 25.87 | 66.05  | 61.38 | 70.50 | 17.68  | 13.61 | 22.39 |
| <b>NPV (%)</b>         | 92.94  | 95.54  | 94.67 | 96.31 | 84.78  | 83.47 | 86.03 | 97.25  | 96.62 | 97.78 |
| <b>Accuracy (%)</b>    | 83.24  | 74.85  | 73.38 | 76.27 | 82.48  | 81.19 | 83.72 | 90.27  | 89.24 | 91.22 |
| <b>Weighted</b>        |        |        |       |       |        |       |       |        |       |       |
| <b>Sensitivity (%)</b> | 47.58  | 65.90  | 60.49 | 71.02 | 37.28  | 33.85 | 40.80 | 38.32  | 30.24 | 46.90 |
| <b>Specificity (%)</b> | 88.92  | 78.10  | 76.94 | 79.23 | 94.91  | 94.07 | 95.66 | 92.54  | 91.64 | 93.38 |
| <b>PPV (%)</b>         | 34.52  | 22.24  | 19.75 | 24.88 | 65.60  | 60.97 | 70.03 | 16.62  | 12.73 | 21.13 |
| <b>NPV (%)</b>         | 93.29  | 96.02  | 95.21 | 96.72 | 85.31  | 84.10 | 86.45 | 97.48  | 96.91 | 97.97 |
| <b>Accuracy (%)</b>    | 84.18  | 77.04  | 75.86 | 78.20 | 82.99  | 81.79 | 84.14 | 90.52  | 89.55 | 91.43 |

## Alternative Definition SA2: LLN and GOLD B/C/D

### *AUCs for continuous predictors*

**eTable 18.** Unweighted and Weighted AUCs (and Their 95% CIs) for Continuous Predictors for COPD Definition SA2

|                        | Uganda |        |       | Nepal |        |       | Peru  |        |       |
|------------------------|--------|--------|-------|-------|--------|-------|-------|--------|-------|
|                        | AUC    | 95% CI |       | AUC   | 95% CI |       | AUC   | 95% CI |       |
| <b>Unweighted AUCs</b> |        |        |       |       |        |       |       |        |       |
| <b>LFQ</b>             | 0.796  | 0.764  | 0.828 | 0.859 | 0.834  | 0.884 | 0.799 | 0.755  | 0.844 |
| <b>CAPTURE W/O PEF</b> | 0.711  | 0.674  | 0.748 | 0.729 | 0.695  | 0.764 | 0.766 | 0.711  | 0.821 |
| <b>CAPTURE</b>         | 0.746  | 0.713  | 0.780 | 0.897 | 0.876  | 0.918 | 0.830 | 0.778  | 0.883 |
| <b>COLA</b>            | 0.785  | 0.753  | 0.817 | 0.883 | 0.859  | 0.906 | 0.821 | 0.773  | 0.868 |
| <b>Weighted AUCs</b>   |        |        |       |       |        |       |       |        |       |
| <b>LFQ</b>             | 0.791  | 0.759  | 0.828 | 0.860 | 0.833  | 0.884 | 0.796 | 0.748  | 0.841 |
| <b>CAPTURE W/O PEF</b> | 0.712  | 0.675  | 0.750 | 0.729 | 0.696  | 0.764 | 0.766 | 0.714  | 0.823 |
| <b>CAPTURE</b>         | 0.742  | 0.707  | 0.777 | 0.895 | 0.871  | 0.915 | 0.825 | 0.771  | 0.880 |
| <b>COLA</b>            | 0.781  | 0.742  | 0.811 | 0.882 | 0.856  | 0.906 | 0.817 | 0.770  | 0.866 |

## Diagnostic accuracy estimates for binary predictors

### CAPTURE

**eTable 19.** Unweighted and Weighted Diagnostic Performance Estimators (All With 95% Confidence Intervals) for CAPTURE, for COPD Definition SA2

|                        | Uganda |        |       | Nepal |        |       | Peru  |        |       |  |
|------------------------|--------|--------|-------|-------|--------|-------|-------|--------|-------|--|
|                        | est    | 95% CI |       | est   | 95% CI |       | est   | 95% CI |       |  |
| <b>Unweighted</b>      |        |        |       |       |        |       |       |        |       |  |
| <b>Sensitivity (%)</b> | 56.28  | 49.62  | 62.77 | 86.24 | 80.50  | 90.81 | 59.46 | 47.41  | 70.73 |  |
| <b>Specificity (%)</b> | 79.09  | 77.67  | 80.46 | 70.58 | 69.01  | 72.12 | 88.86 | 87.77  | 89.89 |  |
| <b>PPV (%)</b>         | 15.70  | 13.29  | 18.36 | 14.21 | 12.24  | 16.37 | 10.21 | 7.52   | 13.46 |  |
| <b>NPV (%)</b>         | 96.32  | 95.54  | 96.99 | 98.91 | 98.41  | 99.29 | 99.04 | 98.63  | 99.35 |  |
| <b>Accuracy (%)</b>    | 77.61  | 76.21  | 78.97 | 71.42 | 69.90  | 72.91 | 88.25 | 87.14  | 89.29 |  |
| <b>Weighted</b>        |        |        |       |       |        |       |       |        |       |  |
| <b>Sensitivity (%)</b> | 54.64  | 47.80  | 61.36 | 85.93 | 80.02  | 90.63 | 60.00 | 47.69  | 71.44 |  |
| <b>Specificity (%)</b> | 79.90  | 78.50  | 81.24 | 70.93 | 69.40  | 72.43 | 88.96 | 87.89  | 89.97 |  |
| <b>PPV (%)</b>         | 14.80  | 12.46  | 17.39 | 13.80 | 11.89  | 15.89 | 9.86  | 7.23   | 13.05 |  |
| <b>NPV (%)</b>         | 96.50  | 95.75  | 97.15 | 98.94 | 98.45  | 99.31 | 99.10 | 98.72  | 99.40 |  |
| <b>Accuracy (%)</b>    | 78.38  | 77.00  | 79.72 | 71.70 | 70.21  | 73.15 | 88.39 | 87.31  | 89.41 |  |

**LFQ (Cutpoint = 18)****eTable 20.** Unweighted and Weighted Diagnostic Performance Estimators (All With 95% Confidence Intervals) for LFQ Considering a Cutpoint of 18, for COPD Definition SA2

|                        | Uganda |        |       | Nepal |        |       | Peru  |        |       |  |
|------------------------|--------|--------|-------|-------|--------|-------|-------|--------|-------|--|
|                        | est    | 95% CI |       | est   | 95% CI |       | est   | 95% CI |       |  |
| <b>Unweighted</b>      |        |        |       |       |        |       |       |        |       |  |
| <b>Sensitivity (%)</b> | 61.47  | 54.86  | 67.78 | 80.42 | 74.04  | 85.83 | 78.38 | 67.28  | 87.11 |  |
| <b>Specificity (%)</b> | 82.06  | 80.71  | 83.34 | 77.85 | 76.40  | 79.24 | 70.75 | 69.20  | 72.26 |  |
| <b>PPV (%)</b>         | 19.16  | 16.39  | 22.19 | 17.02 | 14.61  | 19.65 | 5.40  | 4.13   | 6.93  |  |
| <b>NPV (%)</b>         | 96.85  | 96.14  | 97.47 | 98.60 | 98.07  | 99.01 | 99.35 | 98.95  | 99.63 |  |
| <b>Accuracy (%)</b>    | 80.72  | 79.39  | 82.01 | 77.99 | 76.58  | 79.34 | 70.90 | 69.38  | 72.40 |  |
| <b>Weighted</b>        |        |        |       |       |        |       |       |        |       |  |
| <b>Sensitivity (%)</b> | 58.43  | 51.57  | 65.05 | 79.73 | 73.15  | 85.31 | 76.19 | 64.12  | 85.80 |  |
| <b>Specificity (%)</b> | 83.79  | 82.61  | 84.91 | 78.69 | 77.44  | 79.90 | 71.83 | 70.39  | 73.24 |  |
| <b>PPV (%)</b>         | 18.72  | 15.95  | 21.74 | 16.84 | 14.46  | 19.45 | 5.16  | 3.94   | 6.63  |  |
| <b>NPV (%)</b>         | 96.93  | 96.22  | 97.54 | 98.62 | 98.11  | 99.03 | 99.34 | 98.92  | 99.62 |  |
| <b>Accuracy (%)</b>    | 82.26  | 81.06  | 83.42 | 78.74 | 77.50  | 79.95 | 71.92 | 70.48  | 73.32 |  |

**COLA (Cutpoint = 4)**

**eTable 21.** Unweighted and Weighted Diagnostic Performance Estimators (All With 95% Confidence Intervals) for COLA Considering a Cutpoint of 4 for COPD Definition SA2

|                        | Uganda |        |       | Nepal |        |       | Peru  |        |       |
|------------------------|--------|--------|-------|-------|--------|-------|-------|--------|-------|
|                        | est    | 95% CI |       | est   | 95% CI |       | est   | 95% CI |       |
| <b>Unweighted</b>      |        |        |       |       |        |       |       |        |       |
| <b>Sensitivity (%)</b> | 70.00  | 63.63  | 75.85 | 65.61 | 58.37  | 72.35 | 45.95 | 34.29  | 57.93 |
| <b>Specificity (%)</b> | 74.28  | 72.75  | 75.76 | 90.76 | 89.73  | 91.72 | 92.02 | 91.07  | 92.90 |
| <b>PPV (%)</b>         | 15.86  | 13.67  | 18.26 | 28.64 | 24.42  | 33.15 | 10.93 | 7.69   | 14.94 |
| <b>NPV (%)</b>         | 97.28  | 96.57  | 97.88 | 97.90 | 97.34  | 98.38 | 98.76 | 98.32  | 99.11 |
| <b>Accuracy (%)</b>    | 74.00  | 72.52  | 75.44 | 89.42 | 88.36  | 90.41 | 91.06 | 90.07  | 91.97 |
| <b>Weighted</b>        |        |        |       |       |        |       |       |        |       |
| <b>Sensitivity (%)</b> | 66.37  | 59.55  | 72.73 | 65.06 | 57.71  | 71.91 | 44.33 | 32.57  | 56.56 |
| <b>Specificity (%)</b> | 76.88  | 75.74  | 78.00 | 91.14 | 90.20  | 92.02 | 92.11 | 91.20  | 92.96 |
| <b>PPV (%)</b>         | 15.51  | 13.34  | 17.89 | 28.45 | 24.24  | 32.95 | 10.17 | 7.12   | 13.96 |
| <b>NPV (%)</b>         | 97.28  | 96.55  | 97.89 | 97.97 | 97.41  | 98.43 | 98.80 | 98.36  | 99.14 |
| <b>Accuracy (%)</b>    | 76.25  | 75.08  | 77.40 | 89.80 | 88.82  | 90.72 | 91.17 | 90.22  | 92.06 |

## Alternative Definition SA3: LLN and FEV1<60%

### AUCs for continuous predictors

**eTable 22.** Unweighted and Weighted AUCs (and their 95% CIs) for Continuous Predictors for COPD Definition SA3

|                        | Overall |        |       | Uganda |        |       | Nepal |        |       | Peru  |        |       |
|------------------------|---------|--------|-------|--------|--------|-------|-------|--------|-------|-------|--------|-------|
|                        | AUC     | 95% CI |       | AUC    | 95% CI |       | AUC   | 95% CI |       | AUC   | 95% CI |       |
| <b>Unweighted AUCs</b> |         |        |       |        |        |       |       |        |       |       |        |       |
| <b>LFQ</b>             | 0.829   | 0.806  | 0.852 | 0.806  | 0.750  | 0.861 | 0.852 | 0.827  | 0.877 | 0.814 | 0.726  | 0.903 |
| <b>CAPTURE</b>         | 0.767   | 0.740  | 0.794 | 0.738  | 0.670  | 0.806 | 0.694 | 0.658  | 0.729 | 0.896 | 0.833  | 0.960 |
| <b>COLA</b>            | 0.847   | 0.827  | 0.868 | 0.813  | 0.758  | 0.868 | 0.875 | 0.853  | 0.897 | 0.915 | 0.867  | 0.962 |
| <b>Weighted AUCs</b>   |         |        |       |        |        |       |       |        |       |       |        |       |
| <b>LFQ</b>             | 0.830   | 0.804  | 0.853 | 0.802  | 0.737  | 0.863 | 0.853 | 0.825  | 0.878 | 0.804 | 0.707  | 0.895 |
| <b>CAPTURE</b>         | 0.769   | 0.742  | 0.796 | 0.745  | 0.672  | 0.810 | 0.693 | 0.659  | 0.730 | 0.897 | 0.838  | 0.956 |
| <b>COLA</b>            | 0.848   | 0.826  | 0.869 | 0.811  | 0.746  | 0.863 | 0.875 | 0.851  | 0.898 | 0.911 | 0.859  | 0.960 |

## Diagnostic accuracy estimates for binary predictors

### CAPTURE

**eTable 23.** Unweighted and Weighted Diagnostic Performance Estimators (All With 95% Confidence Intervals) for CAPTURE, for COPD Definition SA3

|                        | Uganda |        |       | Nepal |        |       | Peru  |        |       |
|------------------------|--------|--------|-------|-------|--------|-------|-------|--------|-------|
|                        | est    | 95% CI |       | est   | 95% CI |       | est   | 95% CI |       |
| <b>Unweighted</b>      |        |        |       |       |        |       |       |        |       |
| <b>Sensitivity (%)</b> | 66.18  | 53.68  | 77.21 | 84.95 | 79.32  | 89.54 | 87.50 | 67.64  | 97.34 |
| <b>Specificity (%)</b> | 77.63  | 76.22  | 79.01 | 70.79 | 69.22  | 72.33 | 88.37 | 87.26  | 89.41 |
| <b>PPV (%)</b>         | 5.43   | 3.99   | 7.20  | 15.26 | 13.22  | 17.47 | 4.87  | 3.04   | 7.35  |
| <b>NPV (%)</b>         | 99.16  | 98.74  | 99.47 | 98.70 | 98.16  | 99.12 | 99.90 | 99.72  | 99.98 |
| <b>Accuracy (%)</b>    | 77.42  | 76.01  | 78.78 | 71.62 | 70.10  | 73.10 | 88.36 | 87.26  | 89.40 |
| <b>Sensitivity (%)</b> | 65.84  | 52.76  | 77.36 | 84.75 | 79.01  | 89.43 | 87.55 | 66.20  | 97.69 |
| <b>Specificity (%)</b> | 78.60  | 77.22  | 79.94 | 71.14 | 69.61  | 72.64 | 88.49 | 87.40  | 89.51 |
| <b>PPV (%)</b>         | 5.20   | 3.80   | 6.94  | 14.84 | 12.87  | 16.98 | 4.73  | 2.93   | 7.17  |
| <b>NPV (%)</b>         | 99.23  | 98.84  | 99.52 | 98.74 | 98.22  | 99.14 | 99.91 | 99.73  | 99.98 |
| <b>Accuracy (%)</b>    | 78.38  | 77.00  | 79.71 | 71.90 | 70.42  | 73.35 | 88.48 | 87.40  | 89.50 |

**LFQ (Cutpoint = 18)**

**eTable 24.** Unweighted and Weighted Diagnostic Performance Estimators (All With 95% Confidence Intervals) for LFQ Considering a Cutpoint of 18, for COPD Definition SA3

|                        | Uganda |        |       | Nepal |        |       | Peru  |        |       |
|------------------------|--------|--------|-------|-------|--------|-------|-------|--------|-------|
|                        | est    | 95% CI |       | est   | 95% CI |       | est   | 95% CI |       |
| <b>Unweighted</b>      |        |        |       |       |        |       |       |        |       |
| <b>Sensitivity (%)</b> | 69.12  | 56.74  | 79.76 | 77.18 | 70.84  | 82.73 | 79.17 | 57.85  | 92.87 |
| <b>Specificity (%)</b> | 80.18  | 78.82  | 81.49 | 77.94 | 76.50  | 79.34 | 70.05 | 68.51  | 71.56 |
| <b>PPV (%)</b>         | 6.34   | 4.70   | 8.35  | 17.81 | 15.35  | 20.48 | 1.77  | 1.07   | 2.75  |
| <b>NPV (%)</b>         | 99.26  | 98.87  | 99.54 | 98.22 | 97.64  | 98.69 | 99.80 | 99.53  | 99.93 |
| <b>Accuracy (%)</b>    | 79.97  | 78.61  | 81.27 | 77.90 | 76.50  | 79.26 | 70.12 | 68.58  | 71.62 |
| <b>Weighted</b>        |        |        |       |       |        |       |       |        |       |
| <b>Sensitivity (%)</b> | 66.91  | 53.68  | 78.44 | 76.64 | 70.17  | 82.31 | 76.05 | 51.51  | 92.20 |
| <b>Specificity (%)</b> | 82.11  | 80.93  | 83.24 | 78.80 | 77.53  | 80.02 | 71.19 | 69.75  | 72.60 |
| <b>PPV (%)</b>         | 6.26   | 4.61   | 8.27  | 17.66 | 15.23  | 20.30 | 1.69  | 1.02   | 2.64  |
| <b>NPV (%)</b>         | 99.29  | 98.90  | 99.56 | 98.27 | 97.70  | 98.73 | 99.78 | 99.49  | 99.93 |
| <b>Accuracy (%)</b>    | 81.84  | 80.66  | 82.98 | 78.67 | 77.42  | 79.89 | 71.22 | 69.78  | 72.62 |



**COLA (Cutpoint = 4)**

**eTable 25.** Unweighted and Weighted Diagnostic Performance Estimators (All With 95% Confidence Intervals) for COLA Considering a Cutpoint of 4, for COPD Definition SA3

|                        | Uganda |        |       | Nepal |        |       | Peru  |        |       |  |
|------------------------|--------|--------|-------|-------|--------|-------|-------|--------|-------|--|
|                        | est    | 95% CI |       | est   | 95% CI |       | est   | 95% CI |       |  |
| <b>Unweighted</b>      |        |        |       |       |        |       |       |        |       |  |
| <b>Sensitivity (%)</b> | 73.53  | 61.43  | 83.50 | 61.17 | 54.14  | 67.86 | 70.83 | 48.91  | 87.38 |  |
| <b>Specificity (%)</b> | 72.29  | 70.77  | 73.77 | 90.78 | 89.74  | 91.74 | 91.65 | 90.68  | 92.54 |  |
| <b>PPV (%)</b>         | 4.93   | 3.68   | 6.44  | 29.10 | 24.86  | 33.63 | 5.47  | 3.22   | 8.61  |  |
| <b>NPV (%)</b>         | 99.29  | 98.88  | 99.58 | 97.42 | 96.80  | 97.95 | 99.78 | 99.55  | 99.91 |  |
| <b>Accuracy (%)</b>    | 72.31  | 70.81  | 73.78 | 89.05 | 87.97  | 90.06 | 91.51 | 90.54  | 92.40 |  |
| <b>Weighted</b>        |        |        |       |       |        |       |       |        |       |  |
| <b>Sensitivity (%)</b> | 70.47  | 57.14  | 81.65 | 60.69 | 53.59  | 67.47 | 69.40 | 45.45  | 87.51 |  |
| <b>Specificity (%)</b> | 75.09  | 73.96  | 76.19 | 91.16 | 90.21  | 92.04 | 91.79 | 90.87  | 92.64 |  |
| <b>PPV (%)</b>         | 4.83   | 3.59   | 6.34  | 28.94 | 24.73  | 33.44 | 5.23  | 3.06   | 8.28  |  |
| <b>NPV (%)</b>         | 99.30  | 98.88  | 99.59 | 97.50 | 96.90  | 98.02 | 99.78 | 99.55  | 99.91 |  |
| <b>Accuracy (%)</b>    | 75.01  | 73.86  | 76.12 | 89.45 | 88.46  | 90.38 | 91.64 | 90.72  | 92.50 |  |
