# Supplementary material
Source: PubMed Central journal article supplement (PMC8753498)
Supplement: jama-e2123065-s004.pdf [file jama-e2123065-s004.pdf]

\*Indicates required information. Only first name, last name, and suffix will appear in PubMed.

| <b>*Group Name(s): GECO Study Investigators</b> |                   |                              |                      |                                        |                                          |                                                         |                                                                                            |
|-------------------------------------------------|-------------------|------------------------------|----------------------|----------------------------------------|------------------------------------------|---------------------------------------------------------|--------------------------------------------------------------------------------------------|
| <b>*First Name and Middle Initial(s)</b>        | <b>*Last Name</b> | <b>*Suffix (eg, Jr, III)</b> | Academic Degrees     | Institution                            | Location (city, state/province, country) | Role or Contribution, eg, chair, principal investigator | Group (if more than 1 Group listed in the byline) and/or Subgroup (eg, Steering Committee) |
| Susan                                           | Michie            |                              | Dphil Phil C psychol | University College London              | London, UK                               | Investigator                                            |                                                                                            |
| Zachos                                          | Anastasiou        |                              |                      | University College London              | London, UK                               | Investigator                                            |                                                                                            |
| Shakir                                          | Hossen            |                              | MSPH                 | Johns Hopkins University               | Baltimore, MD                            | Investigator                                            |                                                                                            |
| Nicole                                          | Robertson         |                              | BA                   | Johns Hopkins University               | Baltimore, MD                            | Investigator                                            |                                                                                            |
| Robert A                                        | Wise              |                              | MD                   | Johns Hopkins University               | Baltimore, MD                            | Investigator                                            |                                                                                            |
| Karbir Nath                                     | Yogi              |                              | MD                   | Institute of Medicine                  | Baltimore, MD                            | Investigator                                            |                                                                                            |
| Denis                                           | Mawanda           |                              |                      | Makerere University                    | Kampala, Uganda                          | Investigator                                            |                                                                                            |
| Faith                                           | Nassali           |                              |                      | Makerere University                    | Kampala, Uganda                          | Investigator                                            |                                                                                            |
| Robert                                          | Kalyesubula       |                              | MB ChB Mmed          | Makerere University                    | Kampala, Uganda                          | Investigator                                            |                                                                                            |
| Elisa                                           | Romani-Huacani    |                              |                      | A.B. PRISMA                            | Lima, Peru                               | Investigator                                            |                                                                                            |
| Adithya                                         | Cattamanchi       |                              | MD, MAS              | University of California San Francisco | San Francisco, California                | Investigator                                            |                                                                                            |
